# Supplementary material for: Practitioner perspectives on the application of palaeoecology in nature conservation
Source: Frontiers journal article supplement (doi:10.3389/fevo.2023.1304510), 2023-11-10
Supplement: Data_Sheet_1.xlsx [file Data_Sheet_1.xlsx]

## Sheet: survey responses
StartDate	EndDate	Status	Progress	Duration (in seconds)	Finished	RecordedDate	ResponseId	DistributionChannel	UserLanguage	Q1.2	Q2.1	Q2.2	Q2.2_5_TEXT	Q2.3	Q2.4	Q2.4_9_TEXT	Q2.5	Q2.5_9_TEXT	Q3.1	Q3.2	Q3.3	Q4.4	Q4.1_1	Q4.1_2	Q4.1_3	Q4.1_4	Q4.1_5	Q4.1_6	Q4.1_7	Q4.5	Q23	Q24_1	Q24_2	Q24_3	Q24_4	Q24_5	Q24_6	Q24_7	Q4.2	Q4.3	Q5.1_1	Q5.1_2	Q5.1_3	Q5.1_4	Q5.1_5	Q5.1_6	Q5.1_7	Q5.1_8	Q5.2
Start Date	End Date	Response Type	Progress	Duration (in seconds)	Finished	Recorded Date	Response ID	Distribution Channel	User Language	I confirm I have read the above information and consent to take part in this research	About You What is your job title? (Or previous job title that is relevant to this study)	What part of the conservation sector do you/did you work in? (If you have worked across more than one throughout your career, please choose the one you have spent the most time in) - Selected Choice	What part of the conservation sector do you/did you work in? (If you have worked across more than one throughout your career, please choose the one you have spent the most time in) - Other - Text	How long have you worked in the conservation sector?	What are/were the primary responsibilities in your role? - Selected Choice	What are/were the primary responsibilities in your role? - Other - Text	Which are the main habitat types that you work/worked with? - Selected Choice	Which are the main habitat types that you work/worked with? - Other - Text	About Palaeoecology Had you heard the word "palaeoecology" before being approached about this survey?	Do you feel like you have an understanding of what the word "palaeoecology" means?	In your own words, could you explain what you understand "palaeoecology" to be? Please only write a sentence or two.	Palaeoecology and Conservation Have you had any experience of working with palaeoecological research?	Based on your experience, which of the following ways do you think palaeoecological research can help to inform conservation work ? - Knowing what species used to live in a site	Based on your experience, which of the following ways do you think palaeoecological research can help to inform conservation work ? - Learning about past ecosystem condition	Based on your experience, which of the following ways do you think palaeoecological research can help to inform conservation work ? - Informing about past management practices	Based on your experience, which of the following ways do you think palaeoecological research can help to inform conservation work ? - Setting restoration targets	Based on your experience, which of the following ways do you think palaeoecological research can help to inform conservation work ? - Understanding past ecosystem service provision	Based on your experience, which of the following ways do you think palaeoecological research can help to inform conservation work ? - Establishing the natural state of an ecosystem	Based on your experience, which of the following ways do you think palaeoecological research can help to inform conservation work ? - Historic natural capital valuations	Could you provide some details about what research took place and how you used it?	What resources do you/have you used to access palaeoecological research? (e.g. academic journals, data?)	Which of the following ways do you think palaeoecological research could help to inform conservation work? - Knowing what species used to live on a site	Which of the following ways do you think palaeoecological research could help to inform conservation work? - Learning about past ecosystem condition	Which of the following ways do you think palaeoecological research could help to inform conservation work? - Informing about past management practices	Which of the following ways do you think palaeoecological research could help to inform conservation work? - Setting restoration targets	Which of the following ways do you think palaeoecological research could help to inform conservation work? - Understanding past ecosystem service provision	Which of the following ways do you think palaeoecological research could help to inform conservation work? - Establishing the natural state of an ecosystem	Which of the following ways do you think palaeoecological research could help to inform conservation work? - Historic natural capital valuations	Would you be interested in the findings of palaeoecological research that could support your work?	If you can, please expand on your answer to the previous question e.g. how might it be used?	Barriers Please rank the following in the order by which you would perceive them to be a barrier for the use of palaeoecology to help inform conservation by dragging them into place in the list below - Financial - We don't have the money to spend on things like this, it seems expensive	Barriers Please rank the following in the order by which you would perceive them to be a barrier for the use of palaeoecology to help inform conservation by dragging them into place in the list below - Time constraints - We have limited staff resources and need to focus on our core responsibilities	Barriers Please rank the following in the order by which you would perceive them to be a barrier for the use of palaeoecology to help inform conservation by dragging them into place in the list below - Lack of understanding - I don't really understand how it would help, the language is inaccessible	Barriers Please rank the following in the order by which you would perceive them to be a barrier for the use of palaeoecology to help inform conservation by dragging them into place in the list below - Lack of expertise - We don't have anyone with expertise to interpret or implement this research	Barriers Please rank the following in the order by which you would perceive them to be a barrier for the use of palaeoecology to help inform conservation by dragging them into place in the list below - Lack of interest - I understand the role it could play, but I don't think it would be useful, I'm not interested	Barriers Please rank the following in the order by which you would perceive them to be a barrier for the use of palaeoecology to help inform conservation by dragging them into place in the list below - Relevance - I understand the role it could play, but the results need to be expressed in terms that are relevant to me	Barriers Please rank the following in the order by which you would perceive them to be a barrier for the use of palaeoecology to help inform conservation by dragging them into place in the list below - Communication - There needs to better communication with the researchers doing this work, I'm not able to access publications	Barriers Please rank the following in the order by which you would perceive them to be a barrier for the use of palaeoecology to help inform conservation by dragging them into place in the list below - I perceive there to be few barriers	Do you have any other comments on this or suggestions of barriers that aren't included in the list above?
2023-03-09 14:07:03	2023-03-09 14:11:28	IP Address	100	264	True	2023-03-09 14:11:28	R_2cpWA3IXcrappeF	social	EN	Yes	Citizen scientist officer	Environmental NGO (e.g. Wildlife Trust, RSPB)		0-5 years	Surveying species and habitats,Public engagement inc. education, citizen science, etc.		Woodlands, ancient and semi-natural,Heathlands and acid grasslands,Neutral and calcareous grasslands,Standing open waters and rivers,Wetlands including fens, bogs, grazing marsh etc.,Coastal, saltmarsh and marine		Yes	Yes	Looking at the species that were around 100's years ago, by using water sources and checking the sediment	No										Very helpful	Very helpful	Very helpful	Very helpful	Very helpful	Very helpful	Very helpful	Definitely yes		6	3	1	5	7	4	2	8
2023-03-09 14:09:28	2023-03-09 14:34:38	IP Address	100	1510	True	2023-03-09 14:34:39	R_3PAXn6305UiiMiT	anonymous	EN	Yes	Director	Private (e.g. consultancy)		5-10 years	Delivering practical conservation and land management,Surveying species and habitats,GIS and site mapping,Advisory role inc. planning, land management, etc.		Woodlands, ancient and semi-natural,Standing open waters and rivers,Wetlands including fens, bogs, grazing marsh etc.		Yes	Yes	The study of the historic (pre-significant record keeping) interactions between organisms and their environment (and how these have changed).	Yes								Some paleo sedimentary work freshwater and marine, mostly on the technical side (coring, sample prep etc.). Also some id of freshwater molluscs in peat/pond sediments though it was not possible to age these. The latter has slightly distressed me in realising how knackered most freshwater habitats in terms of diversity and how recently this seems to have occurred	University library, othet online resources, local natural history libraries and collections										1	2	8	3	7	6	5	4	It's mostly about money (and time). Whilst interesting to have some idea about the history of a site we usually know what needs to be done to improve biodiversity or help key species but are ultimately fairly powerless in terms of changing local land use/chemical applications, water abstraction and so forth
2023-03-09 14:10:19	2023-03-09 14:51:47	IP Address	100	2487	True	2023-03-09 14:51:48	R_3P4Xznf7hMHaosc	social	EN	Yes	Engagement and Conservation Officer	Environmental NGO (e.g. Wildlife Trust, RSPB)		5-10 years	Delivering practical conservation and land management,Public engagement inc. education, citizen science, etc.		Woodlands, ancient and semi-natural,Heathlands and acid grasslands,Neutral and calcareous grasslands,Wetlands including fens, bogs, grazing marsh etc.,Upland and montane		Yes	Maybe	The study of historic habitats and associated ecosystems through soil/seed sampling, indicator species, satellite imagery and other evidence, enabling comparison to contemporary landscape use and potentially informing future management.	No										Very helpful	Very helpful	Very helpful	Could be helpful	Could be helpful	Could be helpful	Could be helpful	Probably yes	Refining feasible routes for landscape-level connectivity. Specifically regarding Education, providing supporting evidence for illustrating landscape changes over time.	4	5	3	6	7	1	2	8
2023-03-09 15:11:09	2023-03-09 15:18:39	IP Address	100	449	True	2023-03-09 15:18:39	R_3nkPQ4hsY5d3OKv	anonymous	EN	Yes	Reserves Officer	Environmental NGO (e.g. Wildlife Trust, RSPB)		0-5 years	Delivering practical conservation and land management		Woodlands, ancient and semi-natural,Heathlands and acid grasslands,Neutral and calcareous grasslands,Standing open waters and rivers,Wetlands including fens, bogs, grazing marsh etc.		Yes	Yes	Looking within the soils and geological records to find evidence of flora that would have existed at the location of interest.	No										Very helpful	Could be helpful	Very helpful	Could be helpful	Could be helpful	Could be helpful	Very helpful	Definitely yes		2	1	7	4	8	6	5	3	Ecosystems change over time so research must be interpreted carefully.
2023-03-09 15:10:03	2023-03-09 15:19:55	IP Address	100	591	True	2023-03-09 15:19:55	R_1FwUWZ4gNKga5pa	anonymous	EN	Yes	Senior Ecologist	Private (e.g. consultancy)		5-10 years	Writing site management plans,Surveying species and habitats,Advisory role inc. planning, land management, etc.		Woodlands, ancient and semi-natural,Heathlands and acid grasslands,Neutral and calcareous grasslands,Standing open waters and rivers,Peri-urban and urban greenspaces		Yes	Yes	The ecology of habitats previously present in an area, including animals, plants and climate and how they functioned together	No										Very helpful	Very helpful	Very helpful	Very helpful	Very helpful	Very helpful	Very helpful	Definitely yes	I feel it is particularly helpful when understanding how baselines have shifted and what species occur naturally. It can inform management practices and targets within plans	4	6	3	2	7	5	1	8
2023-03-09 15:13:16	2023-03-09 15:22:32	IP Address	100	556	True	2023-03-09 15:22:32	R_piPEUUc8FOmqL97	anonymous	EN	Yes	Head of Projects and Partnerships	Environmental NGO (e.g. Wildlife Trust, RSPB)		5-10 years	Delivering practical conservation and land management,Senior leadership		Woodlands, ancient and semi-natural,Heathlands and acid grasslands,Neutral and calcareous grasslands,Standing open waters and rivers,Wetlands including fens, bogs, grazing marsh etc.		Yes	Maybe	Something along the lines of how ecosystems have changed and will change over time, by studying organisms and their interaction.	No										Very helpful	Very helpful	Very helpful	Very helpful	Very helpful	Very helpful	Very helpful	Definitely yes	My department looks at Natural Capital and also focuses on landscape level restoration. We need to know what to restore too really, over and above our own conservation ideals and linked with Climate change, its past effect and future effect.	3	1	7	5	8	2	6	4	SWT staff come at this from a different angle as I know it is us that is undertaking the research through a PhD.
2023-03-09 15:34:20	2023-03-09 15:46:21	IP Address	100	721	True	2023-03-09 15:46:22	R_8HXabCAnOx5u9BD	anonymous	EN	Yes	Outdoor Learning Manager and former consultant ecologist	Environmental NGO (e.g. Wildlife Trust, RSPB)		15+ years	Delivering practical conservation and land management,Surveying species and habitats,Public engagement inc. education, citizen science, etc.		Woodlands, ancient and semi-natural,Standing open waters and rivers,Peri-urban and urban greenspaces		Yes	Yes	Study of organisms/ assemblages of organisms across geological timescales	No										Very helpful	Could be helpful	Could be helpful	Could be helpful	Very helpful	Very helpful	Could be helpful	Definitely yes	Would be of interest for educaiton and engagement purposes but could also be useful for future management plans for the sites we work on and considering adaptations to climate change predictions.	4	1	6	5	8	2	3	7
2023-03-09 16:09:58	2023-03-09 16:12:32	IP Address	100	154	True	2023-03-09 16:12:33	R_3nvkZgSgsKpPeTT	anonymous	EN	Yes	Data & GIS Officer	Environmental NGO (e.g. Wildlife Trust, RSPB)		0-5 years	GIS and site mapping		Woodlands, ancient and semi-natural,Heathlands and acid grasslands,Standing open waters and rivers,Wetlands including fens, bogs, grazing marsh etc.,Peri-urban and urban greenspaces		No	No		No										Very helpful	Very helpful	Could be helpful	Could be helpful	Very helpful	Very helpful	Could be helpful	May or may not		3	1	4	2	7	6	5	8
2023-03-09 16:12:12	2023-03-09 16:23:21	IP Address	100	669	True	2023-03-09 16:23:22	R_9nNjydqyBm5gPe1	anonymous	EN	Yes	Nature Recovery Manager	Environmental NGO (e.g. Wildlife Trust, RSPB)		0-5 years	Writing site management plans,Delivering practical conservation and land management,Public engagement inc. education, citizen science, etc.		Wetlands including fens, bogs, grazing marsh etc.		Yes	Maybe	A study of historical ecology from fossil remains, pollen records etc.	No										Very helpful	Very helpful	Could be helpful	Not helpful	Very helpful	Could be helpful	Could be helpful	Definitely yes	Understanding how species have reacted to past climatic events or how their behaviours have changed over time can help us to understand what might change in the future. Given the rapidly changing climate this can help us to maximise impact where it is going to be most useful.	1	2	5	3	7	6	4	8	In order to do the research justice or to properly implement changes based on the research it would need to be done at a large scale, at the very least at a landscape scale and possibly at a national level which would require resources, coordination and funding.
2023-03-09 16:09:18	2023-03-09 16:24:47	IP Address	100	928	True	2023-03-09 16:24:47	R_79z3goIA8sSBZ3r	anonymous	EN	Yes	Land Advisor	Environmental NGO (e.g. Wildlife Trust, RSPB)		0-5 years	Surveying species and habitats,GIS and site mapping,Advisory role inc. planning, land management, etc.,Other	Project delivery	Woodlands, ancient and semi-natural,Neutral and calcareous grasslands,Wetlands including fens, bogs, grazing marsh etc.,Other	Agricultural	Yes	Yes	Research into how organisms of the past may have interacted with each other and their environment.	No										Could be helpful	Could be helpful	Could be helpful	Not helpful	Very helpful	Could be helpful	Very helpful	May or may not		3	4	5	2	7	1	6	8	It could be useful, but I'm already at my working capacity, so don't see how I can justify the time needed to get up to speed for the information to be useful.
2023-03-09 16:07:46	2023-03-09 16:28:05	IP Address	100	1219	True	2023-03-09 16:28:06	R_RaidRMgfke8ZQhX	anonymous	EN	Yes	Senior Living Landscape Officer	Environmental NGO (e.g. Wildlife Trust, RSPB)		0-5 years	Writing site management plans,Delivering practical conservation and land management,Surveying species and habitats,GIS and site mapping		Woodlands, ancient and semi-natural,Standing open waters and rivers,Wetlands including fens, bogs, grazing marsh etc.		Yes	Maybe	Investigating the environment for insights into previous species presence / abundance, one example I've come across is analysing pollen present within peat samples.	No										Very helpful	Very helpful	Very helpful	Very helpful	Could be helpful	Very helpful	Very helpful	Definitely yes	Lowland rivers and wetlands have been modified way beyond their natural baseline, even the oldest of maps do not show their original state. Tracking their evolution and change into modified system would be incredibly helpful with restoration efforts.	4	3	6	5	8	7	2	1
2023-03-09 16:32:21	2023-03-09 16:39:06	IP Address	100	405	True	2023-03-09 16:39:07	R_BKYplXdm2P9bCiR	anonymous	EN	Yes	Reserves Officer	Environmental NGO (e.g. Wildlife Trust, RSPB)		10-15 years	Writing site management plans,Delivering practical conservation and land management,Surveying species and habitats,GIS and site mapping,Strategy and policy		Woodlands, ancient and semi-natural,Neutral and calcareous grasslands,Standing open waters and rivers		No	No		No										Very helpful	Very helpful	Very helpful	Very helpful	Could be helpful	Very helpful	Could be helpful	Definitely yes	Understanding our nature reserves better and using that knowledge to develop/restore/maintain them in the most beneficial way for biodiversity	2	1	5	3	4	7	6	8
2023-03-09 16:33:00	2023-03-09 16:56:48	IP Address	100	1428	True	2023-03-09 16:56:49	R_3qfiDkqC2pocm4O	anonymous	EN	Yes	Lead Specialist Advisor, Freshwater Habitats and Species	Statutory body (e.g. DEFRA, Natural England)		15+ years	Writing site management plans,Surveying species and habitats,Strategy and policy,Advisory role inc. planning, land management, etc.		Standing open waters and rivers		Yes	Yes	Using animal and plant remains buried in sediments (as well as sediment geochemistry) to understand past ecological conditions at a site.	Yes	Very helpful	Very helpful	Could be helpful	Could be helpful	Could be helpful	Could be helpful	Could be helpful	Have used palaeoecology in a number of eutrophied Welsh lakes to determine past state and chronology of environmental change. This helped to inform management targets and decisions.	Academic journals; commissioned reports.										3	2	5	7	6	8	4	1	Most of these (apart from the top 3) do not apply to me, though they may apply to others in the organization. In Wales we have done a fair bit of palaeoecology, and the majority of the lakes where we do not have data are lower priority because we do not think we have a nutrient problem in them. It's also worth saying that palaeoecological studies are less relevant now due to the presence of bette…
2023-03-09 17:08:51	2023-03-09 17:19:49	IP Address	100	658	True	2023-03-09 17:19:49	R_1P2a4tc980MpfVT	anonymous	EN	Yes	Director of Landscape Recovery	Environmental NGO (e.g. Wildlife Trust, RSPB)		15+ years	Senior leadership		Woodlands, ancient and semi-natural,Heathlands and acid grasslands,Neutral and calcareous grasslands,Standing open waters and rivers,Wetlands including fens, bogs, grazing marsh etc.,Coastal, saltmarsh and marine,Peri-urban and urban greenspaces,Upland and montane		Yes	Yes	Ecology in the past.	Yes	Very helpful	Very helpful	Very helpful	Could be helpful	Could be helpful	Could be helpful	Could be helpful	My research area was (I've not been a researcher for a long time) related to using peatland palaeoecology (macrofossils mainly) to reconstruct past climates. This is useful in itself but has conservation implications has it gives you an understanding of what 'natural' and natural variability looks like for peatlands; particularly relevant because of debates about naturalness in British peatlands.…	No access to academic journals - mostly from popular science resources these days.										7	2	3	5	6	4	1	8	Rather little palaeoecological research is focussed on real-world issues. More applied research would be useful.
2023-03-09 17:35:34	2023-03-09 17:52:12	IP Address	100	997	True	2023-03-09 17:52:12	R_eL4rH4FgwDUjYDn	anonymous	EN	Yes	Chief Executive of a Wildlife Trust	Environmental NGO (e.g. Wildlife Trust, RSPB)		15+ years	Senior leadership		Woodlands, ancient and semi-natural,Heathlands and acid grasslands,Neutral and calcareous grasslands,Standing open waters and rivers,Wetlands including fens, bogs, grazing marsh etc.		Yes	Yes	Understanding past environments, landscapes and ecological processes by using plant and animal signals, often in the form of subfossil (or fossil) plant and animal remains	Yes	Very helpful	Very helpful	Could be helpful	Could be helpful	Could be helpful	Very helpful	Could be helpful	I spent 6 years part-time researching subfossil beetle assemblages on two large lowland raised bogs in southern Yorkshire, and relating changes in those assemblages from Bronze Age to present day, to the current ecology of the species (I am a coloepterist, among other things). This informed large-scale restoration of the cut-over and drained mires, and helps establish the success or otherwise of …	Journals, books, raw data from research archaeologists and palaeoecologists.										4	2	7	5	8	6	3	1	Lack of accessible review articles which are of sufficient depth. Conservation staff read 'British Wildlife' and there have been a few useful articles, especially focussed around Vera's hypotheses, but there's little between that very general and rather superficial overview, and often-site-specific individual research papers (or, if the reviews exist, I've not had time to find them!)
2023-03-09 22:00:45	2023-03-09 22:08:38	IP Address	100	473	True	2023-03-09 22:08:39	R_3Hi4XW2QEMpNlhk	social	EN	Yes	Ecology Contractor	Private (e.g. consultancy)		0-5 years	Surveying species and habitats		Woodlands, ancient and semi-natural,Neutral and calcareous grasslands,Standing open waters and rivers,Peri-urban and urban greenspaces		Yes	Maybe	Piecing together the ecology of extinct species - mostly fossils	No										Could be helpful	Could be helpful	Could be helpful	Could be helpful	Could be helpful	Could be helpful	Could be helpful	May or may not		4	6	7	2	8	1	3	5
2023-03-10 07:41:00	2023-03-10 07:45:31	IP Address	100	270	True	2023-03-10 07:45:31	R_2BhNmNrsSHNRRxr	anonymous	EN	Yes	Conservation Lead	Environmental NGO (e.g. Wildlife Trust, RSPB)		15+ years	Writing site management plans,Delivering practical conservation and land management,Surveying species and habitats,GIS and site mapping,Public engagement inc. education, citizen science, etc.,Advisory role inc. planning, land management, etc.		Woodlands, ancient and semi-natural,Neutral and calcareous grasslands,Standing open waters and rivers,Wetlands including fens, bogs, grazing marsh etc.,Peri-urban and urban greenspaces		Yes	No		No										Not helpful	Not helpful	Not helpful	Not helpful	Not helpful	Not helpful	Not helpful	Probably yes		4	5	2	1	6	3	8	7
2023-03-10 08:31:17	2023-03-10 08:41:28	IP Address	100	611	True	2023-03-10 08:41:29	R_3JEKVwFeWZVexHI	social	EN	Yes	Conservation and Farm Manager	Environmental NGO (e.g. Wildlife Trust, RSPB)		5-10 years	Writing site management plans,Delivering practical conservation and land management,Surveying species and habitats,GIS and site mapping,Strategy and policy,Public engagement inc. education, citizen science, etc.,Advisory role inc. planning, land management, etc.		Standing open waters and rivers,Wetlands including fens, bogs, grazing marsh etc.		Yes	Yes	Using remains of plant and animals, fossils pollen etc to study past ecology.	No										Could be helpful	Very helpful	Could be helpful	Could be helpful	Could be helpful	Could be helpful	Could be helpful	Definitely yes	Currently manage an upland farm. Understanding the density of large herbivores in the uplands under natural conditions. The timing, type and density of grazing in the uplands in a natural state. Looking appropriate tree species assemblages for planting schemes. Understanding current condition of blanket bog relative to a more natural state.	3	1	6	5	8	7	2	4
2023-03-10 08:25:32	2023-03-10 08:45:25	IP Address	100	1192	True	2023-03-10 08:45:25	R_rdu9scEsJKrRdjH	social	EN	Yes	Trustee	Environmental NGO (e.g. Wildlife Trust, RSPB)		5-10 years	Other	Trustee	Woodlands, ancient and semi-natural,Heathlands and acid grasslands,Neutral and calcareous grasslands,Other	Farmland (AES)	Yes	Yes	Study of ancient deposits (such as pollen found in lake sediments) to understand what was in the environment in years gone by. Trees, grasses etc can be identified and the deposits aged by Carbon dating	Yes	Very helpful	Very helpful	Very helpful	Could be helpful	Could be helpful	Could be helpful	Very helpful	Limited experience but was part of my degree studies.	None recently. Previously taught by Dr Birks										3	1	7	4	5	6	2	8	Modern land use dictates the areas that may still be conserved. Mapping (and valuing) these should be the starting point. We have moved to far from ancient habitats, but a back to the 50s (or 1800?) approach is much more feasible.
2023-03-10 09:02:07	2023-03-10 09:21:07	IP Address	100	1140	True	2023-03-10 09:21:08	R_3p8Wq18GK9zKyLN	anonymous	EN	Yes	Senior Monitoring and Research Officer	Environmental NGO (e.g. Wildlife Trust, RSPB)		10-15 years	Surveying species and habitats		Woodlands, ancient and semi-natural,Heathlands and acid grasslands,Neutral and calcareous grasslands,Standing open waters and rivers,Wetlands including fens, bogs, grazing marsh etc.		Yes	Maybe	The study of historical ecosystems	No										Very helpful	Very helpful	Very helpful	Could be helpful	Could be helpful	Very helpful	Could be helpful	Definitely yes	It would vary I think with sites, but knowing and understanding the ways ecology has changed in the past could help us better predict future changes and so adjust management to ensure we have healthy ecosystems going forwards. More recently historical data could help us set baselines & desirable outcomes for restoration projects, as well as helping to highlight where recent changes have occurred …	4	2	7	3	8	6	5	1	Lack of resources are the biggest barrier at present - no time, expertise or money. If we had someone come to us saying I'll do all the research for free then it would be a matter of communication - what the research shows & what that means for these sites.
2023-03-10 09:13:53	2023-03-10 09:21:07	IP Address	100	434	True	2023-03-10 09:21:08	R_2w1wk1Pz1lNjDxq	anonymous	EN	Yes	GIS Officer	Environmental NGO (e.g. Wildlife Trust, RSPB)		0-5 years	GIS and site mapping		Woodlands, ancient and semi-natural		Yes	No		No										Could be helpful	Very helpful	Not helpful	Could be helpful	Could be helpful	Very helpful	Not helpful	May or may not	It would be useful for mapping previous extent of habitats, as justification for restoring those habitats	4	2	5	3	7	1	6	8
2023-03-10 09:20:01	2023-03-10 09:29:16	IP Address	100	555	True	2023-03-10 09:29:16	R_1F56C3CgPEuxDL8	anonymous	EN	Yes	Head of Ecological Evidence	Environmental NGO (e.g. Wildlife Trust, RSPB)		15+ years	GIS and site mapping,Strategy and policy,Senior leadership,Advisory role inc. planning, land management, etc.		Woodlands, ancient and semi-natural,Heathlands and acid grasslands,Neutral and calcareous grasslands,Standing open waters and rivers,Wetlands including fens, bogs, grazing marsh etc.,Peri-urban and urban greenspaces		Yes	Yes	Looking at ecological evidence from distant past, e.g. pollen record	No										Could be helpful	Not helpful	Could be helpful	Could be helpful	Not helpful	Could be helpful	Not helpful	May or may not	For me the focus is restoration and increasing resilience of nature so the recent past is more useful that the distant past, i.e. understanding what optimal ecosystem function is and whether we are missing any components of that ecosystem due to relative recent losses from that system (100-200 or so years perhaps).	1	2	6	3	5	7	4	8
2023-03-10 09:05:26	2023-03-10 09:38:29	IP Address	100	1983	True	2023-03-10 09:38:29	R_a5bmp5j3hfqiCJj	social	EN	Yes	Nature Recovery Assistant	Private (e.g. consultancy)		0-5 years	Writing site management plans,GIS and site mapping		Woodlands, ancient and semi-natural,Neutral and calcareous grasslands,Standing open waters and rivers		Yes	Yes	Historical studies on Ecology and how it has changed over time, beyond direct records.	No										Very helpful	Very helpful	Very helpful	Could be helpful	Could be helpful	Could be helpful	Very helpful	Probably yes	Having a better understanding of the past ecosystem (palaeoecology) will be helpful for interpreting land and natural processing that are trying to occur. This is limited however because the future may now hold something new - but it will be driven by processes embedded in evolution that have been through the palaeontological cycles	3	4	7	6	5	1	2	8	1 being the highest barrier of the list. Meta option - Being trapped in study without implementing or moving forwards. We can learn lots by interpretation through time, not only looking at the past. Relevance one - not that it’s not relevant at its core, but that too much information is paralysing and no one could ever hold to all knowledge at a time, so over burdened by information - and even aw…
2023-03-10 09:45:44	2023-03-10 09:49:44	IP Address	100	239	True	2023-03-10 09:49:44	R_ergKm9TEKZNURz3	anonymous	EN	Yes	Policy and Advocacy Manager	Environmental NGO (e.g. Wildlife Trust, RSPB)		0-5 years	Strategy and policy,Public engagement inc. education, citizen science, etc.,Advisory role inc. planning, land management, etc.		Woodlands, ancient and semi-natural,Neutral and calcareous grasslands,Standing open waters and rivers,Wetlands including fens, bogs, grazing marsh etc.,Coastal, saltmarsh and marine,Peri-urban and urban greenspaces		Yes	Maybe	The study of past ecological systems	No										Very helpful	Very helpful	Could be helpful	Could be helpful	Could be helpful	Could be helpful	Could be helpful	Probably yes		1	2	3	6	5	7	4	8
2023-03-10 09:49:49	2023-03-10 09:58:11	IP Address	100	501	True	2023-03-10 09:58:11	R_1GNXppD2GtvYDNj	anonymous	EN	Yes	Nature Based Solutions Officer	Environmental NGO (e.g. Wildlife Trust, RSPB)		0-5 years	GIS and site mapping,Advisory role inc. planning, land management, etc.		Woodlands, ancient and semi-natural,Heathlands and acid grasslands,Neutral and calcareous grasslands,Standing open waters and rivers,Wetlands including fens, bogs, grazing marsh etc.,Peri-urban and urban greenspaces		Yes	Maybe	Studying past/historical ecology and interactions between organisms	No										Very helpful	Very helpful	Very helpful	Very helpful	Very helpful	Very helpful	Very helpful	Definitely yes		3	1	6	2	8	7	4	5
2023-03-10 10:26:47	2023-03-10 10:38:51	IP Address	100	724	True	2023-03-10 10:38:51	R_pcwW80Xdl3hObXH	anonymous	EN	Yes	Assistant Ecologist	Environmental NGO (e.g. Wildlife Trust, RSPB)		0-5 years	Writing site management plans,Surveying species and habitats,Other	Writing survey reports for clients	Woodlands, ancient and semi-natural,Heathlands and acid grasslands,Neutral and calcareous grasslands,Peri-urban and urban greenspaces		No	Yes	The study of interactions between past/fossil organisms and of the interactions with their habitat, using palaeontological methods.	No										Very helpful	Could be helpful	Could be helpful	Very helpful	Very helpful	Very helpful	Very helpful	Definitely yes	As you have stated previously, shifting baselines is a very real risk in Ecology in the modern day. For someone starting off in the UK ecology sector, I have not got a grasp on the state of nature and animal/plant populations 100, 200 or 500 years ago. Therefore learning about what ecosystems and animal/plant populations looked like in a semi-natural, or less depleted state, is useful to know wha…	2	5	6	1	8	7	3	4	I think another barrier would be the implications of the research. If the research implies that the UK is so Nature Depleted that nothing short of a paradigm shift in government policy and public attitudes can restore the UK's wildlife, I think organisations and the public as a whole will find such implications unpalatable to deal with. Therefore communication of such results in a digestible way,…
2023-03-10 12:12:51	2023-03-10 12:24:59	IP Address	100	728	True	2023-03-10 12:24:59	R_1IhFNx5gNPKKiRE	social	EN	Yes	Ecological GIS technician	Private (e.g. consultancy)		15+ years	GIS and site mapping,Strategy and policy,Other	Partnership working, Planning	Woodlands, ancient and semi-natural,Heathlands and acid grasslands,Neutral and calcareous grasslands,Standing open waters and rivers,Wetlands including fens, bogs, grazing marsh etc.,Coastal, saltmarsh and marine,Peri-urban and urban greenspaces,Upland and montane		Yes	No		No										Could be helpful	Could be helpful	Could be helpful	Could be helpful	Could be helpful	Could be helpful	Could be helpful	Probably yes	I often analyse current (and recent past) species and habitat distributions for clients. It could be helpful to have an historic baseline for comparison. This is especially important to help us to realise the scale of loss.	2	4	5	3	7	6	1	8	Lack of accessible data - obviously historic records are more difficult to process, so this kind of data is not getting to practitioners via NBN/LERCs or any other means. To use palaeoecology in my work, I would need historic records to be accessible, and in formats that I can use in conjunction with modern biological records.
2023-03-10 12:26:22	2023-03-10 12:39:10	IP Address	100	767	True	2023-03-10 12:39:10	R_11bzMo8T8yz9OTP	anonymous	EN	Yes	Director of Natural Solutions	Statutory body (e.g. DEFRA, Natural England)		15+ years	Delivering practical conservation and land management,Strategy and policy,Senior leadership		Woodlands, ancient and semi-natural,Wetlands including fens, bogs, grazing marsh etc.,Upland and montane		Yes	Yes	Ecology from the past, both historic and archaeological. For example, pollen records or evidence of feeding of animals (buts, branches) in the soil layers.	Yes	Very helpful	Very helpful	Could be helpful	Very helpful	Very helpful	Very helpful	Very helpful	I am involved with developing a paleo-ecology study with the University of Manchester, relating to beavers. The study has not happened yet. We will be looking at it for historic species presence or absence.											8	5	3	1	4	7	6	2	I think that many of these are organisationally relevant but I can personally see the value. So cultural across the organisation, lots of people would rate various of these more highly than I do, but I need to get across the relevance more effectively.
2023-03-10 14:20:49	2023-03-10 14:25:45	IP Address	100	295	True	2023-03-10 14:25:45	R_1cYQzBjKSxGm0Uy	social	EN	Yes	Head of Digital Development	Environmental NGO (e.g. Wildlife Trust, RSPB)		0-5 years	GIS and site mapping,Strategy and policy		Woodlands, ancient and semi-natural		Yes	Yes	The study of prehistoric ecology and application of that to the modern day.	No										Very helpful	Very helpful	Very helpful	Very helpful	Very helpful	Very helpful	Very helpful	Definitely yes	Setting Local Nature Recovery Strategy targets and priorities, it'd be very useful. Assessing areas for species reintroduction, complementing species distribution models in that sense.	2	1	5	7	6	4	3	8
2023-03-10 15:23:56	2023-03-10 15:54:10	IP Address	100	1814	True	2023-03-10 15:54:10	R_2zceCDwdlsdpmu5	anonymous	EN	Yes	Natural Networks Officer	Environmental NGO (e.g. Wildlife Trust, RSPB)		0-5 years	Writing site management plans,Surveying species and habitats,GIS and site mapping,Advisory role inc. planning, land management, etc.		Woodlands, ancient and semi-natural,Neutral and calcareous grasslands,Standing open waters and rivers,Wetlands including fens, bogs, grazing marsh etc.,Peri-urban and urban greenspaces		Yes	Yes	The study of past ecosystems (or historical ecosystems - usually in a prehistory context, but up to industrial revolutions time for more niche localised habitat changes)	No										Very helpful	Very helpful	Very helpful	Could be helpful	Very helpful	Could be helpful	Very helpful	Definitely yes	In more of a "local extinctions" and "land use/habitat change" way, to educate people in how their patch has changed ecologically in the last 200 years or so. But we must be careful not to hold this as a gold standard in a changing world (climate change).	5	2	4	1	6	7	3	8
2023-03-10 16:50:30	2023-03-10 16:57:15	IP Address	100	405	True	2023-03-10 16:57:16	R_rjcD5GZBwq3tmYp	anonymous	EN	Yes	River Restoration Assistant	Environmental NGO (e.g. Wildlife Trust, RSPB)		0-5 years	Delivering practical conservation and land management,Surveying species and habitats,GIS and site mapping,Public engagement inc. education, citizen science, etc.		Standing open waters and rivers		Yes	Maybe	The ecology of the past, eg using things like sediment cores to determine past species assemblages	No										Very helpful	Very helpful	Could be helpful	Very helpful	Very helpful	Very helpful	Could be helpful	Definitely yes	For things like wetland restoration, it would be useful to know what plant species were present there in the past so they can be reintroduced	2	3	6	1	7	5	4	8
2023-03-11 18:08:42	2023-03-11 18:16:29	IP Address	100	466	True	2023-03-11 18:16:29	R_3Jz5P6qq675MfXA	social	EN	Yes	Evidence Manager	Environmental NGO (e.g. Wildlife Trust, RSPB)		5-10 years	Surveying species and habitats,GIS and site mapping		Woodlands, ancient and semi-natural,Heathlands and acid grasslands,Neutral and calcareous grasslands,Wetlands including fens, bogs, grazing marsh etc.,Peri-urban and urban greenspaces		No	No		No										Not helpful	Not helpful	Could be helpful	Not helpful	Could be helpful	Not helpful	Could be helpful	May or may not		7	4	2	5	6	1	3	8
2023-03-11 20:23:55	2023-03-11 20:41:34	IP Address	100	1058	True	2023-03-11 20:41:34	R_1q2JHMnBQDx2mCM	social	EN	Yes	Catchment Development Manager	Environmental NGO (e.g. Wildlife Trust, RSPB)		0-5 years	Writing site management plans,Delivering practical conservation and land management,Surveying species and habitats,GIS and site mapping,Strategy and policy,Senior leadership,Public engagement inc. education, citizen science, etc.,Advisory role inc. planning, land management, etc.		Woodlands, ancient and semi-natural,Heathlands and acid grasslands,Standing open waters and rivers,Wetlands including fens, bogs, grazing marsh etc.,Peri-urban and urban greenspaces,Upland and montane		Yes	Yes	The ecosystem make up and function of the past. In this context I would assume it refers to ecology and ecological function of the landscape since the last glacial maximum and before significant human influence.	Yes	Very helpful	Very helpful	Very helpful	Very helpful	Very helpful	Could be helpful	Could be helpful	I don’t understand this question. It is important to understand past habitats, species supported, and ecosystem services provided. But we need to consider the climatic and environmental changes driven by climate change, along with palaeoecology to inform land management and restoration plans.	Have mainly used informal discussions with experts. Journal subscription fees prevent full use of academic datasets.										5	2	8	6	7	3	1	4
2023-03-11 22:19:58	2023-03-11 22:34:15	IP Address	100	857	True	2023-03-11 22:34:16	R_1N9cxeJ5DlUm0aC	anonymous	EN	Yes	Senior Ecological Consultant	Private (e.g. consultancy)		5-10 years	Writing site management plans,Surveying species and habitats,GIS and site mapping,Advisory role inc. planning, land management, etc.		Woodlands, ancient and semi-natural,Heathlands and acid grasslands,Neutral and calcareous grasslands,Standing open waters and rivers,Wetlands including fens, bogs, grazing marsh etc.,Peri-urban and urban greenspaces		Yes	Yes	Archaeology but for ecology? Archaecology?	Yes	Could be helpful	Could be helpful	Could be helpful	Could be helpful	Not helpful	Very helpful	Could be helpful	I did some sediment coring on my MSc at UCL	Carl Sayer and associated resources - so in person expertise and journals.										2	1	4	5	7	3	8	6	In humanised landscapes, maybe the general anthropocene, baselines aren't as helpful maybe. I'd like to recommend Inheritors of the Earth by Chris D Thomas. He doesn't get everything right but it's a provocative read that challenges some of our assumptions on wildlife conservation. Oh also Europe by Tim Flannery - especially the bit about wolf hybridisation in Europe.
2023-03-11 23:43:50	2023-03-11 23:48:47	IP Address	100	297	True	2023-03-11 23:48:48	R_2AR94IBz4JEv2gB	social	EN	Yes	Biodiversity officer	Statutory body (e.g. DEFRA, Natural England)		0-5 years	Writing site management plans,Delivering practical conservation and land management,Surveying species and habitats,GIS and site mapping,Advisory role inc. planning, land management, etc.		Woodlands, ancient and semi-natural,Heathlands and acid grasslands,Neutral and calcareous grasslands,Standing open waters and rivers,Wetlands including fens, bogs, grazing marsh etc.		No	No		No										Very helpful	Very helpful	Very helpful	Very helpful	Very helpful	Very helpful	Very helpful	Definitely yes	Rewilding and restoration is always well intended but is often done blindly and without knowledge of species, processes and management techniques that used to maintain UK green space. And evidence base for this as well as specific era to aim to restore nature too would be very helpful	1	4	5	3	6	8	2	7
2023-03-12 09:47:47	2023-03-12 10:25:28	IP Address	100	2261	True	2023-03-12 10:25:29	R_3GfRDH738laYNqE	social	EN	Yes	I was head o biology at the Institute of Oceaanogrraphic Sciences and more recently a founder member of the Farnham Biodiversit Group	Environmental NGO (e.g. Wildlife Trust, RSPB)		15+ years	Senior leadership		Other	Oceans	Yes	Yes	Interpreting the past ecologies based on fossil and archaeological evidence.	No										Very helpful	Very helpful	Could be helpful	Could be helpful	Could be helpful	Very helpful	Not helpful	May or may not		6	4	5	1	8	2	3	7
2023-03-12 11:34:52	2023-03-12 11:38:10	IP Address	100	198	True	2023-03-12 11:38:10	R_4UFR3jzLnOZH1Jv	anonymous	EN	Yes	Reserves Officer	Environmental NGO (e.g. Wildlife Trust, RSPB)		0-5 years	Delivering practical conservation and land management,Surveying species and habitats,GIS and site mapping		Heathlands and acid grasslands		Yes	No		Yes	Very helpful	Very helpful	Could be helpful	Very helpful	Very helpful	Very helpful	Could be helpful												3	2	6	1	8	5	4	7
2023-03-12 20:13:00	2023-03-12 20:37:45	IP Address	100	1484	True	2023-03-12 20:37:46	R_3qfiwZ8yHn1tXNf	anonymous	EN	Yes	Voluntary Warden at Priest Hill Nature Reserve	Environmental NGO (e.g. Wildlife Trust, RSPB)		5-10 years	Delivering practical conservation and land management,Surveying species and habitats		Woodlands, ancient and semi-natural,Neutral and calcareous grasslands		Yes	Maybe	The study of relationships between organisms in past environments.	No										Very helpful	Very helpful	Very helpful	Could be helpful	Could be helpful	Very helpful	Could be helpful	Probably yes	I would be interested to know if any fossil evidence could exist at Priest Hill nature reserve that could indicate the organisms present before the area was farmland.	8	5	7	4	6	2	3	1
2023-03-13 08:56:31	2023-03-13 09:02:19	IP Address	100	348	True	2023-03-13 09:02:20	R_2aqoZEghJxOCD7I	anonymous	EN	Yes	Ancient woodland Inventory Analyst	Environmental NGO (e.g. Wildlife Trust, RSPB)		0-5 years	Surveying species and habitats,GIS and site mapping,Other	Updating local databses	Woodlands, ancient and semi-natural		Yes	Yes	The study of past environmental remains.	Yes	Very helpful	Very helpful	Very helpful	Could be helpful	Could be helpful	Not helpful	Could be helpful	Used microfossil remains to establish the impact of human activity on an upland site, as part of a research project	Microfossils extracted from peat cores Academic journals Previous microfossil databases										1	3	6	2	7	8	4	5
2023-03-13 09:07:49	2023-03-13 09:15:17	IP Address	100	447	True	2023-03-13 09:15:17	R_2trgwnD4Ys7YiQG	anonymous	EN	Yes	Reserves Assistant	Environmental NGO (e.g. Wildlife Trust, RSPB)		5-10 years	Writing site management plans,Delivering practical conservation and land management,Surveying species and habitats,Public engagement inc. education, citizen science, etc.		Woodlands, ancient and semi-natural,Heathlands and acid grasslands,Neutral and calcareous grasslands,Standing open waters and rivers,Wetlands including fens, bogs, grazing marsh etc.,Peri-urban and urban greenspaces,Upland and montane		No	No		No										Could be helpful	Could be helpful	Not helpful	Not helpful	Very helpful	Not helpful	Very helpful	May or may not	I think, from my very basic understanding, that it could be used to look at population levels and habiat and species health in the past, but I do not think that it should/could eb used to guide us on current targets or aims for restoration. Climate change is too big of a factor, we need to adapt and plan for climate change not do more looking at the past and trying to preserve what has already be…	8	2	3	1	7	6	5	4	I hadn't even heard about it until today, so it would be good to read more about it in accessible publications.
2023-03-13 09:17:32	2023-03-13 09:25:48	IP Address	100	495	True	2023-03-13 09:25:49	R_2rkomBqquqNivaf	social	EN	Yes	Zooarchaeologist	Private (e.g. consultancy)		15+ years	Surveying species and habitats,Public engagement inc. education, citizen science, etc.,Advisory role inc. planning, land management, etc.		Woodlands, ancient and semi-natural,Wetlands including fens, bogs, grazing marsh etc.		Yes	Yes	Ecology of past landscapes	Yes	Very helpful	Very helpful	Very helpful	Could be helpful	Very helpful	Very helpful	Very helpful	I work in environmental archaeology on a landscape scale. My work draws on archaeological finds, to understand what species communities used, how the landscape was utilised and land managed, what livestock was reared etc. We use this evidence to understand past environments and animal-human relations.	Primary research, data collection on archaeological evidence - from excavations. Own data.										5	4	7	3	6	8	2	1
2023-03-13 09:23:27	2023-03-13 09:28:20	IP Address	100	293	True	2023-03-13 09:28:21	R_20lDhkl9y9x3nGx	anonymous	EN	Yes	Conservation officer	Environmental NGO (e.g. Wildlife Trust, RSPB)		0-5 years	Delivering practical conservation and land management,Surveying species and habitats,Public engagement inc. education, citizen science, etc.,Advisory role inc. planning, land management, etc.		Standing open waters and rivers		Yes	No		No										Could be helpful	Could be helpful	Could be helpful	Could be helpful	Could be helpful	Could be helpful	Could be helpful	Probably yes		6	1	5	2	7	4	3	8
2023-03-13 10:02:20	2023-03-13 10:21:48	IP Address	100	1167	True	2023-03-13 10:21:48	R_2YzzaVySCDjpwjG	anonymous	EN	Yes	Nature Recovery Manager	Environmental NGO (e.g. Wildlife Trust, RSPB)		0-5 years	Strategy and policy		Other	all of the above	Yes	Maybe	Understanding of how fossil organisms existed in ecological contexts.	No										Very helpful	Very helpful	Could be helpful	Could be helpful	Very helpful	Could be helpful	Could be helpful	Probably yes	My role is looking at nature recovery. Obviously this will be based on relatively recent trends and so it may be thought that the fossil record has less relevance. However, with a knowledge of the fauna, flora and ecosystems and how they operated and interacted in past climatic conditions may help us to understand restoration pathways in the context of future climate and environmental scenarios. …	6	4	7	5	8	1	2	3	The best approach I think would be partnership with the academic community to bring the expertise to the NGO sector. I don't know what the financial implications are so can't comment on that but building funded research and practitioner partnerships in this area could be interesting as it will bring different skills to the table in carefully designed mutually beneficial projects as well as the fu…
2023-03-13 11:32:19	2023-03-13 11:47:15	IP Address	100	895	True	2023-03-13 11:47:15	R_1eJ19HOqwOYQwLe	anonymous	EN	Yes	Head of Ecology	Environmental NGO (e.g. Wildlife Trust, RSPB)		15+ years	Writing site management plans,Surveying species and habitats,GIS and site mapping		Woodlands, ancient and semi-natural,Heathlands and acid grasslands,Neutral and calcareous grasslands,Standing open waters and rivers,Wetlands including fens, bogs, grazing marsh etc.		Yes	Yes	In the UK - Palaeoecology is the study of habitats/ plant communities post the ice age, so roughly 10,000 years ago. this provides information on how the UK habitats have developed over time, which is useful to inform decisions about what and why we care for certain habitats more than others	Yes	Very helpful	Very helpful	Very helpful	Could be helpful	Not helpful	Very helpful	Not helpful	pollen cores from one of my fen sites which helped show how long the peat/fen community had been established and how it had been managed in the past	none - above happened to be a student project Oxford Uni were carrying out and it was super interesting to find out the results for. otherwise, just general reading....										5	1	7	4	8	6	2	3
2023-03-13 14:48:27	2023-03-13 14:54:58	IP Address	100	390	True	2023-03-13 14:54:59	R_2dpdjJvH4Fv96qO	anonymous	EN	Yes	Volunteer conservationist	Environmental NGO (e.g. Wildlife Trust, RSPB)		10-15 years	Delivering practical conservation and land management		Heathlands and acid grasslands,Neutral and calcareous grasslands		Yes	Maybe	Use of past ecology through geology, seed banks etc, in order to inform land management today	Yes	Very helpful	Could be helpful	Could be helpful	Could be helpful	Could be helpful	Could be helpful	Could be helpful	Research done by Imperial on peat bog depth informs likely success of rewetting	Individual studies										4	1	6	3	8	2	5	7	A lot of focus on priority habitats in already protected places, we want to know how to make significant biodiversity gain from 'ordinary' starting points, such as semi-improved grassland, scrubland...
2023-03-13 15:13:50	2023-03-13 15:20:08	IP Address	100	378	True	2023-03-13 15:20:09	R_af36ChIL1Beygq5	anonymous	EN	Yes	nature reserves team leader	Environmental NGO (e.g. Wildlife Trust, RSPB)		10-15 years	Writing site management plans,Delivering practical conservation and land management,Surveying species and habitats		Woodlands, ancient and semi-natural,Neutral and calcareous grasslands,Standing open waters and rivers,Wetlands including fens, bogs, grazing marsh etc.,Peri-urban and urban greenspaces		Yes	Yes	Something about looking into the ecology of previous times (eg looking at peat cores for pollen to show what plants were there in the past).	No										Very helpful	Very helpful	Very helpful	Could be helpful	Could be helpful	Could be helpful	Very helpful	Definitely yes	To understand the previous extent of a certain habitat type that I am working on, to create an idea of where it may be possible to recreate that habitat. Or perhaps thinking about species that are now extinct in relict sites, but that had been present in the past (and whe this was).	1	2	6	4	7	5	3	8
2023-03-13 17:01:10	2023-03-13 17:10:10	IP Address	100	539	True	2023-03-13 17:10:11	R_3PuA7ioXJ4pDhQq	anonymous	EN	Yes	CEO	Environmental NGO (e.g. Wildlife Trust, RSPB)		15+ years	GIS and site mapping,Strategy and policy,Senior leadership		Woodlands, ancient and semi-natural,Heathlands and acid grasslands,Neutral and calcareous grasslands,Standing open waters and rivers,Wetlands including fens, bogs, grazing marsh etc.,Peri-urban and urban greenspaces		Yes	Maybe	Using the methodologies, principles and discipline of palaeontology and applying it to understanding ecology and changes to ecological systems	No										Very helpful	Very helpful	Very helpful	Very helpful	Very helpful	Very helpful	Very helpful	Definitely yes	To inform the most effective way to approach 'nature's recovery' and help prioritise how we deliver restoration/creation interventions. I also think there will be significant engagement opportunities	3	2	6	1	7	4	5	8
2023-03-13 19:41:19	2023-03-13 19:58:24	IP Address	100	1024	True	2023-03-13 19:58:25	R_8vlsdnONgpWdYch	social	EN	Yes	GIS Officer	Environmental NGO (e.g. Wildlife Trust, RSPB)		5-10 years	GIS and site mapping		Heathlands and acid grasslands,Neutral and calcareous grasslands,Standing open waters and rivers,Wetlands including fens, bogs, grazing marsh etc.,Peri-urban and urban greenspaces		No	Maybe	Ecology of fossil plants and animals gives us more knowledge of our environment and the flora and fauna	No										Very helpful	Could be helpful	Could be helpful	Not helpful	Very helpful	Very helpful	Could be helpful	Probably not		4	3	6	2	8	7	5	1
2023-03-14 09:13:47	2023-03-14 09:27:53	IP Address	100	845	True	2023-03-14 09:27:54	R_1jjjaukMCCdtmpJ	anonymous	EN	Yes	Conservation Officer	Environmental NGO (e.g. Wildlife Trust, RSPB)		0-5 years	Writing site management plans,Delivering practical conservation and land management,Public engagement inc. education, citizen science, etc.,Advisory role inc. planning, land management, etc.		Heathlands and acid grasslands,Neutral and calcareous grasslands,Peri-urban and urban greenspaces		Yes	Maybe	Study of ecology throughout history (not present day)	No										Very helpful	Could be helpful	Very helpful	Could be helpful	Could be helpful	Very helpful	Could be helpful	Definitely yes	Identifying where species historically existed and new effective ways to manage those sites for inhabiting species.	2	1	5	4	7	6	3	8	Current society provides vastly differing starting point and environment making many suggested management techniques challenging
2023-03-14 09:30:59	2023-03-14 09:39:33	IP Address	100	513	True	2023-03-14 09:39:34	R_1iqjYJ9FIzRINjE	anonymous	EN	Yes	Senior Reserves Manager	Environmental NGO (e.g. Wildlife Trust, RSPB)		15+ years	Writing site management plans,Delivering practical conservation and land management,Surveying species and habitats,Strategy and policy,Senior leadership		Woodlands, ancient and semi-natural,Neutral and calcareous grasslands,Standing open waters and rivers,Wetlands including fens, bogs, grazing marsh etc.		Yes	Maybe	Past environments reconstructed from fossil plants and animals	No										Could be helpful	Could be helpful	Could be helpful	Not helpful	Could be helpful	Could be helpful	Could be helpful	May or may not	Perhaps a frame of reference for past ecological conditions and communities but with different parameters.	8	3	6	5	4	1	7	2
2023-03-14 09:35:46	2023-03-14 10:16:00	IP Address	100	2413	True	2023-03-14 10:16:00	R_QafiAIMfhF321nH	anonymous	EN	Yes	Conservation officer	Environmental NGO (e.g. Wildlife Trust, RSPB)		0-5 years	Writing site management plans,Delivering practical conservation and land management,Surveying species and habitats,Public engagement inc. education, citizen science, etc.		Neutral and calcareous grasslands,Peri-urban and urban greenspaces		Yes	Yes	The Study of interactions between the environment and populations of organisms especially extinct species and landscapes or previous relationships between currently extant species or historical landscapes.	No										Very helpful	Could be helpful	Very helpful	Very helpful	Very helpful	Very helpful	Very helpful	Definitely yes	my main work is restoring pollinator communities through grassland restoration. restoration of grassland depends on many hydrological, geological, and biological interactions. on a practical local scale knowing the history of a specific sites management or species distributions helps set goals, e.g. if a site has had meadows in the last 100 years, a diverse seedbank may be present. if grazing was…	2	1	7	5	8	4	3	6	it's less communication between researchers and professional conservation practitioners I see as a barrier we have access to papers and books and we often have good links with researchers or consultants if needed . i see research as not engaging the public and other practitioners or non-policy makers. consultancy time and money to research a site or landscape before restoration decisions are the …
2023-03-14 10:52:30	2023-03-14 10:56:39	IP Address	100	249	True	2023-03-14 10:56:40	R_2e2bPBhbUrFPR9x	anonymous	EN	Yes	Conservation Officer	Environmental NGO (e.g. Wildlife Trust, RSPB)		0-5 years	Surveying species and habitats,Public engagement inc. education, citizen science, etc.,Advisory role inc. planning, land management, etc.		Woodlands, ancient and semi-natural,Heathlands and acid grasslands,Neutral and calcareous grasslands,Wetlands including fens, bogs, grazing marsh etc.,Upland and montane		Yes	Yes		No										Very helpful	Very helpful	Could be helpful	Could be helpful	Could be helpful	Very helpful	Could be helpful	Probably yes		5	1	7	3	8	2	4	6
2023-03-14 15:03:44	2023-03-14 15:19:12	IP Address	100	928	True	2023-03-14 15:19:13	R_2wLxE8A7g6L49xT	anonymous	EN	Yes	B-Lines officer	Environmental NGO (e.g. Wildlife Trust, RSPB)		15+ years	Writing site management plans,Delivering practical conservation and land management,Surveying species and habitats,Strategy and policy,Public engagement inc. education, citizen science, etc.,Advisory role inc. planning, land management, etc.		Heathlands and acid grasslands,Neutral and calcareous grasslands,Peri-urban and urban greenspaces		Yes	Maybe	gaining an understanding of how ecology (species, habitats, distribution and interactions) has changed through fossil evidence	No										Very helpful	Could be helpful	Very helpful	Could be helpful	Could be helpful	Could be helpful	Could be helpful	May or may not		7	2	4	6	3	1	5	8	It's not understanding what to do on a site that is the problem it's getting people on board with doing it and continuing to do it, buy in, money, knowledge of how. I don't think this is relevant to us in most instances.
2023-03-14 14:51:33	2023-03-14 17:34:24	IP Address	100	9770	True	2023-03-14 17:34:25	R_3mjXOFzNW0Jihv4	anonymous	EN	Yes	Conservation Director	Environmental NGO (e.g. Wildlife Trust, RSPB)		15+ years	Delivering practical conservation and land management,Surveying species and habitats,Strategy and policy,Senior leadership,Advisory role inc. planning, land management, etc.		Standing open waters and rivers		Yes	Yes	Palaeoecology is the use of fossils and other remains to understand previous land use and climate with a view to investigates species and habitat relationships.	Yes	Very helpful	Very helpful	Could be helpful	Could be helpful	Could be helpful	Very helpful	Not helpful		Mostly journals										3	1	5	2	8	4	6	7
2023-03-15 10:01:57	2023-03-15 10:24:13	IP Address	100	1336	True	2023-03-15 10:24:14	R_Rkqr7K9xhPvzQTD	anonymous	EN	Yes	Trainee volunteer co-ordinator	Environmental NGO (e.g. Wildlife Trust, RSPB)		0-5 years	Delivering practical conservation and land management		Woodlands, ancient and semi-natural,Neutral and calcareous grasslands,Other	farmland	No	Maybe	Study of fossil and past ecology and comparing them to organisms now.	No										Very helpful	Very helpful	Very helpful	Very helpful	Could be helpful	Very helpful	Very helpful	Definitely yes	Paleoecology could show us what species existed on the site in the past and how it changed though out time. Even if we are unable to recreate this habitat dude to species loss, land management rules .ect, It could be beneficial to for understanding our history and how the land once was. Information could be used in making the public more engaged in wildlife and land practices.	2	5	6	4	3	7	1	8	Even if you were to find out what habitat species were on the land back in the past. It doesn't change the fact that we are losing land due to infustructure. We already know that there was aurcoch, ancient horses, bears, lynx, bison and beaver living in UK but this don't change the fact we can't reintroduce them in many places because there isn't any space for them anymore.
2023-03-15 10:31:01	2023-03-15 10:41:53	IP Address	100	652	True	2023-03-15 10:41:53	R_3lDpPn1A5SXrhAx	anonymous	EN	Yes	Wetland officer	Environmental NGO (e.g. Wildlife Trust, RSPB)		0-5 years	Delivering practical conservation and land management,Advisory role inc. planning, land management, etc.		Standing open waters and rivers,Wetlands including fens, bogs, grazing marsh etc.		Yes	No		No										Could be helpful	Could be helpful	Very helpful	Very helpful	Very helpful	Very helpful	Very helpful	Probably yes	It would be used to help restore wetlands to what they where and inform decisions in this process	3	1	5	4	8	2	6	7
2023-03-15 14:19:21	2023-03-15 14:42:44	IP Address	100	1402	True	2023-03-15 14:42:44	R_25LzTreJ5KQ0EOD	anonymous	EN	Yes	Data and Evidence Manager (Peat)	Environmental NGO (e.g. Wildlife Trust, RSPB)		5-10 years	Writing site management plans,Delivering practical conservation and land management,Surveying species and habitats,GIS and site mapping,Other	Monitoring restoration, managing research.	Wetlands including fens, bogs, grazing marsh etc.,Upland and montane		Yes	Yes	Looking at the historic ecology of a site using things like soil cores to look at the paleo plant or animal matter present to infer the historcal conditions (animals, plants, climate etc.)	Yes	Very helpful	Very helpful	Could be helpful	Very helpful	Could be helpful	Could be helpful	Could be helpful	Peat cores of the blanket bogs I work on has helped inform which sphagnum species have previously been present on the sites and what may be a target to reintroduce to the area -work is ongoing.	Journals for breakdown of peat cores, working with PhD students.										1	3	7	2	8	5	4	6	Working on land we do not own we are often constrained with the breadth of data we can obtain and where.
2023-03-15 17:04:09	2023-03-15 17:14:38	IP Address	100	629	True	2023-03-15 17:14:39	R_3exnnOezjdQm914	anonymous	EN	Yes	National Specialist - Freshwater & Catchments	Environmental NGO (e.g. Wildlife Trust, RSPB)		15+ years	Strategy and policy,Advisory role inc. planning, land management, etc.		Standing open waters and rivers,Wetlands including fens, bogs, grazing marsh etc.		Yes	Yes	Reconstructing past environments or environmental/ecological conditions from sedimentary or fossil remains	Yes	Very helpful	Very helpful	Could be helpful	Very helpful	Could be helpful	Very helpful	Could be helpful	Determining lake reference conditions to inform future management and target setting at site level Determining type-specific nutrient targets for groups of lakes	Journals Bespoke research e.g via PhDs and contracts										1	3	8	5	7	6	4	2	Main barrier is financial - would love to have palaeo insights for all of our lake and wetland sites across NT in E, W and NI
2023-03-15 19:17:12	2023-03-15 19:30:22	IP Address	100	789	True	2023-03-15 19:30:23	R_YWAO2psPFXR363n	social	EN	Yes	Conservation Project Officer	Environmental NGO (e.g. Wildlife Trust, RSPB)		5-10 years	Writing site management plans,Delivering practical conservation and land management,Surveying species and habitats,GIS and site mapping,Strategy and policy,Public engagement inc. education, citizen science, etc.,Advisory role inc. planning, land management, etc.		Standing open waters and rivers,Wetlands including fens, bogs, grazing marsh etc.,Coastal, saltmarsh and marine,Peri-urban and urban greenspaces		Yes	Yes	Reconstructing ecology over historic timescales	Yes	Very helpful	Very helpful	Very helpful	Very helpful	Very helpful	Very helpful	Very helpful	Using paleoecoloy to reconstruct past conditions (salinity, lake levels, system stability) to inform future decision making and management practices (abstraction and water consumption)	Academic journals, historic records, preserved samples										1	3	8	2	7	6	4	5	Difficult to budget into short term projects and reporting - project funding often time limited so difficult to factor in paleo side of research
2023-03-16 11:29:26	2023-03-16 11:47:03	IP Address	100	1057	True	2023-03-16 11:47:03	R_RQddIVwo8trh7k5	anonymous	EN	Yes	Senior Countryside Officer	Local government (e.g. borough or county council)		15+ years	Writing site management plans,Delivering practical conservation and land management,Surveying species and habitats,GIS and site mapping,Public engagement inc. education, citizen science, etc.,Advisory role inc. planning, land management, etc.		Woodlands, ancient and semi-natural,Heathlands and acid grasslands,Neutral and calcareous grasslands,Standing open waters and rivers,Peri-urban and urban greenspaces		No	Maybe	By looking at soil samples, evidence can be gathered as to what the habitat was like many years ago.	No										Could be helpful	Could be helpful	Very helpful	Could be helpful	Very helpful	Very helpful	Very helpful	Definitely yes	If the landscape wasn't drastically different then it would be very useful to compare the habitats condition and management practices. Knowledge from the holocene would be extremely interesting but perhaps more recent history might have a more practical use and be helpful in managing the land now.	3	2	6	5	8	1	7	4	I'm sure finance and time would be an issue but no idea of what the cost would be.
2023-03-16 13:22:11	2023-03-16 13:40:11	IP Address	100	1079	True	2023-03-16 13:40:12	R_2y2FBYTLUYh1bLW	anonymous	EN	Yes	Ranger	Environmental NGO (e.g. Wildlife Trust, RSPB)		10-15 years	Delivering practical conservation and land management,Surveying species and habitats,GIS and site mapping,Strategy and policy,Public engagement inc. education, citizen science, etc.,Advisory role inc. planning, land management, etc.		Woodlands, ancient and semi-natural,Heathlands and acid grasslands,Neutral and calcareous grasslands,Standing open waters and rivers		Yes	Yes	Palaoecology is in my understanding is the ecology of the past, with focus on past habitats both flora and fauna.	No										Could be helpful	Very helpful	Could be helpful	Could be helpful	Could be helpful	Could be helpful	Very helpful	Probably yes	Learning about past management techniques and level of pollens within given time. That would be useful in understanding and preserving ancient habitats such as wood pasture	3	2	8	5	7	6	1	4
2023-03-09 15:26:56	2023-03-09 15:32:53	IP Address	48	357	False	2023-03-16 15:50:59	R_2zMeRRywzBulfYv	anonymous	EN	Yes	Manager of Surrey Wildlife Trust Ecology Planning Advice Service	Environmental NGO (e.g. Wildlife Trust, RSPB)		10-15 years	Advisory role inc. planning, land management, etc.		Woodlands, ancient and semi-natural,Heathlands and acid grasslands,Neutral and calcareous grasslands,Standing open waters and rivers,Wetlands including fens, bogs, grazing marsh etc.,Peri-urban and urban greenspaces		Yes	Maybe	Using past ecological interactions and networks to understand how current interaction and networks could be managed better. To use past climate and natural events (like flooding, perhaps) to understand how past ecosystems were impacted and adapted.	No
2023-03-09 18:14:40	2023-03-09 18:16:40	IP Address	40	119	False	2023-03-16 18:16:41	R_24Uxv1omXs5j51T	social	EN	Yes	Ecologist	Private (e.g. consultancy)		5-10 years	Surveying species and habitats,GIS and site mapping,Advisory role inc. planning, land management, etc.,Other	Digital capability	Woodlands, ancient and semi-natural,Standing open waters and rivers,Peri-urban and urban greenspaces		No	No
2023-03-16 20:49:33	2023-03-16 21:09:12	IP Address	100	1179	True	2023-03-16 21:09:13	R_stBTqqnTfafOUWR	anonymous	EN	Yes	Surrey Nature Partnership Administrative Officer	Environmental NGO (e.g. Wildlife Trust, RSPB)		0-5 years	Other	Administrative	Other		Yes	Yes	The study of fossils in relation to ecology.	No										Could be helpful	Very helpful	Could be helpful	Could be helpful	Very helpful	Very helpful	Could be helpful	May or may not	I wouldn't directly effect me as the support function for Surrey Nature Partnership, however it could be informative for them as an organisation who works closely with the Wildlife Trust.	6	7	3	8	2	1	4	5
2023-03-17 08:42:33	2023-03-17 09:20:24	IP Address	100	2271	True	2023-03-17 09:20:24	R_10JAHU9vPTHE7os	anonymous	EN	Yes	Head Ranger	Local government (e.g. borough or county council)		15+ years	Writing site management plans,Delivering practical conservation and land management,Strategy and policy		Woodlands, ancient and semi-natural		Yes	No		Yes	Could be helpful	Could be helpful	Could be helpful	Not helpful	Not helpful	Could be helpful	Could be helpful	Pollen sampling conducted in association with archaeological investigation of a Roman villa. It found that the vegetative makeup of the site in the early Roman period was similar to now, which is great evidence to have for interpretative purposes.	None										2	3	6	5	8	1	7	4	We have learnt that it's very important to plan and explain the need for our work in the here and now - ie what do we need to do now to maintain biodiversity? Approaches that steer management practices based on a perception of the past can backfire and can lead to accusations such as 'your only cutting these trees because you think you know what it used to look like.' In this respect it's the eco…
2023-03-10 09:28:36	2023-03-10 09:41:40	IP Address	80	783	False	2023-03-17 09:41:45	R_1FRMmTwCCkZ6Svg	anonymous	EN	Yes	GIS, Monitoring & Research Officer	Environmental NGO (e.g. Wildlife Trust, RSPB)		0-5 years	GIS and site mapping		Woodlands, ancient and semi-natural,Heathlands and acid grasslands,Neutral and calcareous grasslands		Yes	Maybe	Studying the ecological interactions in past ecosystems, over the longer-term, i.e., greater than human lifespans. In the absence of direct data collection, palaeoecology relies on proxies e.g., from pollen / fossil records, to make inferences about ecosystems and landscapes and how they have changed over time.	No										Could be helpful	Very helpful	Could be helpful	Not helpful	Could be helpful	Not helpful	Could be helpful	Definitely yes		2	3	4	1	8	7	6	5
2023-03-10 09:15:27	2023-03-10 09:46:39	IP Address	72	1871	False	2023-03-17 09:46:43	R_ZDozAkRqWrHVDEJ	anonymous	EN	Yes	LNP Information Officer	Environmental NGO (e.g. Wildlife Trust, RSPB)		15+ years	GIS and site mapping,Other	Data management	Woodlands, ancient and semi-natural,Heathlands and acid grasslands,Neutral and calcareous grasslands,Standing open waters and rivers,Wetlands including fens, bogs, grazing marsh etc.,Coastal, saltmarsh and marine,Peri-urban and urban greenspaces		Yes	Maybe	Ancient ecology	No										Could be helpful	Could be helpful	Could be helpful	Could be helpful	Could be helpful	Could be helpful	Could be helpful	Probably yes
2023-03-17 11:38:43	2023-03-17 11:58:15	IP Address	100	1171	True	2023-03-17 11:58:16	R_2OJYAkw0NA0Z2vb	anonymous	EN	Yes	Wilder Schools Team Leader	Environmental NGO (e.g. Wildlife Trust, RSPB)		5-10 years	Public engagement inc. education, citizen science, etc.,Other	Teaching	Woodlands, ancient and semi-natural,Other	School grounds	No	Maybe	Using evidence from the Triassic/Jurassic (dinosaur/plant fossils) to understand more about how climate change may effect the state of nature in the future.	No										Very helpful	Very helpful	Very helpful	Very helpful	Very helpful	Very helpful	Very helpful	May or may not	It may be useful for my own knowledge and understanding rather than perhaps the work that I do with the students that I teach...open for discussion!	2	1	7	4	8	5	6	3	I feel I have more understanding that perhaps other members of my organisation as I am able to discuss and talk to the researcher about this topic. Perhaps short, regular updates to the rest of the organisation would keep staff more interested?
2023-03-17 15:48:02	2023-03-17 16:10:55	IP Address	100	1372	True	2023-03-17 16:10:55	R_cJepyqYWWkTBzzP	anonymous	EN	Yes	Ranger	Other	work for site managed as charity for City of London Corp which has some private and local auth roles	10-15 years	Writing site management plans,Delivering practical conservation and land management,Surveying species and habitats,GIS and site mapping,Public engagement inc. education, citizen science, etc.		Woodlands, ancient and semi-natural,Neutral and calcareous grasslands,Wetlands including fens, bogs, grazing marsh etc.		Yes	Maybe	the study of historical ecology, geology and geography and how it informs the current ecological context and conditions	Yes	Very helpful	Very helpful	Very helpful	Could be helpful	Could be helpful	Could be helpful	Could be helpful	pollen and core sampling by a visiting university group, performed on a heathland bog system to establish the depth, age and biodiversity using strata and pollen profiles. This gave us the approximate age of the bog, the depth and historical context of the bog formation, and the profile of flora that was present long term. This caused us to re-evaluate the presence of scots pine and question our …	conservation journals such as Conservation Land Management if they include it in an article										2	1	5	3	7	6	4	8
2023-03-18 09:30:27	2023-03-18 09:57:33	IP Address	100	1625	True	2023-03-18 09:57:33	R_3qsw2JT5dzCkk4S	anonymous	EN	Yes	Head Ranger, Ashtead Common NNR	Local government (e.g. borough or county council)		15+ years	Writing site management plans,Delivering practical conservation and land management,Surveying species and habitats,Public engagement inc. education, citizen science, etc.		Woodlands, ancient and semi-natural,Wetlands including fens, bogs, grazing marsh etc.		Yes	Yes	Study of ecological evidence of past landscapes & factors that influenced those landscapes in the distant past, possibly prehistoric past.	Yes	Very helpful	Very helpful	Very helpful	Could be helpful	Could be helpful	Could be helpful	Could be helpful	My team were working with English Heritage & Natural England to research historic landuse of Ashtead Common SSSI/NNR, a 200ha wooded common & ancient wood pasture system with particular focus on the SAM archeological site with remains of a bronze age triangular earthworks and Roman villa, bath house & brick/tile kilns. A team from Kingston University were supported and licensed to take core sampl…	We did some personal reading research but at time limited but had close contact with the professor, his postgraduates and undergraduate research team and were provided with both data and written report. It appeared to show that hazel was a lot more prevelent on the site in Roman times as opposed to now and later historic shift to oak pollards and grazing as a primary land-use.										5	6	7	2	8	3	1	4	In my past role as a manager & team leader for an organisation protecting & conserving site of scientific & historic interest I always felt that there was insufficient focus in management plans & therefore budgets with regard to ALL research. So a relatively new field of palaeoecology was having to battle for restricted resources against existing more established methodology of species & habitat …
2023-03-18 14:52:19	2023-03-18 15:39:25	IP Address	100	2825	True	2023-03-18 15:39:25	R_3fTyV1amFc1BiSL	social	EN	Yes	Ecologist	Private (e.g. consultancy)		0-5 years	Surveying species and habitats,GIS and site mapping		Woodlands, ancient and semi-natural,Neutral and calcareous grasslands,Standing open waters and rivers,Peri-urban and urban greenspaces		Yes	Yes	Use of a range of disciplines (e.g. fossils, biology, geology, climatology) to study and reconstruct past species/populations/communities/ecosystems	No										Very helpful	Very helpful	Very helpful	Very helpful	Could be helpful	Could be helpful	Could be helpful	Probably yes	The findings of palaeoecological research could perhaps be better applied to larger scale rewilding projects or nature recovery networks than some of the smaller sites encountered through private ecological consultancy. It could be very useful in determining suitable locations for reintroductions based on fossil records or re-establishing wildlife corridors/stepping stones between biodiversity ho…	3	1	5	4	8	7	2	6
2023-03-20 12:23:10	2023-03-20 12:37:17	IP Address	100	847	True	2023-03-20 12:37:17	R_31pwzB6YCaWuCKk	anonymous	EN	Yes	Project Manager	Environmental NGO (e.g. Wildlife Trust, RSPB)		15+ years	Delivering practical conservation and land management,Strategy and policy,Public engagement inc. education, citizen science, etc.		Woodlands, ancient and semi-natural,Heathlands and acid grasslands,Neutral and calcareous grasslands,Standing open waters and rivers,Wetlands including fens, bogs, grazing marsh etc.		Yes	Yes	The study of past ecosystems.	No										Very helpful	Very helpful	Could be helpful	Very helpful	Very helpful	Very helpful	Could be helpful	Definitely yes	Providing an understanding of the historical extent and "natural state" of specific areas/regions or individual sites. Linking this understanding to conservation management of sites and how we approach habitat restoration/creation elsewhere.	4	3	6	1	7	5	2	8
2023-03-13 21:00:09	2023-03-13 21:10:35	IP Address	72	625	False	2023-03-20 21:10:37	R_2YmHXqpodeyjqPL	anonymous	EN	Yes	director for nature's recovery	Environmental NGO (e.g. Wildlife Trust, RSPB)		15+ years	Writing site management plans,Delivering practical conservation and land management,Strategy and policy,Senior leadership,Advisory role inc. planning, land management, etc.		Woodlands, ancient and semi-natural,Heathlands and acid grasslands,Neutral and calcareous grasslands,Standing open waters and rivers,Wetlands including fens, bogs, grazing marsh etc.,Coastal, saltmarsh and marine,Other		Yes	Yes	wildlife and environment in relation to or as seen in the past	Yes	Very helpful	Very helpful	Could be helpful	Could be helpful	Could be helpful	Could be helpful	Could be helpful	Lidar images to locate and restore historic wetland features within subsequently farmed environments. Identification of historic lake community to review changes in trophic conditions and food availability for birds.
2023-03-21 10:27:41	2023-03-21 10:42:45	IP Address	100	904	True	2023-03-21 10:42:45	R_eyry1mL0psmnROF	anonymous	EN	Yes	Countryside Estates Officer	Local government (e.g. borough or county council)		15+ years	Writing site management plans,Delivering practical conservation and land management,Surveying species and habitats,Public engagement inc. education, citizen science, etc.,Advisory role inc. planning, land management, etc.		Woodlands, ancient and semi-natural,Heathlands and acid grasslands,Standing open waters and rivers,Wetlands including fens, bogs, grazing marsh etc.,Peri-urban and urban greenspaces		Yes	Maybe	Knowledge gained from new technology is enabling us to piece together a more detailed picture of habitats millions of years ago. Specifically the interactions between organisms.	No										Very helpful	Could be helpful	Very helpful	Could be helpful	Could be helpful	Could be helpful	Could be helpful	Definitely yes	Informing about past management practices. Knowing what was there before.	2	3	5	6	8	1	4	7	Nitrogen deposition, pollution deposition, climate change are accelerating changes on our sites so wondering how relevant this is for the future. I mean it will be nice to know exactly what WAS on a site, but not much use in future management of an intensively used urban fringe wildlife site that used to be heath, is now mature woodland, and will continue to develop as woodland.
2023-03-21 12:31:19	2023-03-21 12:41:19	IP Address	100	599	True	2023-03-21 12:41:19	R_2wsKEa2X8GantVf	anonymous	EN	Yes	Chair, Surrey Amphibian & Reptile Group	Environmental NGO (e.g. Wildlife Trust, RSPB)		15+ years	Delivering practical conservation and land management,Surveying species and habitats,GIS and site mapping,Strategy and policy,Senior leadership,Public engagement inc. education, citizen science, etc.,Advisory role inc. planning, land management, etc.		Woodlands, ancient and semi-natural,Heathlands and acid grasslands,Neutral and calcareous grasslands,Standing open waters and rivers,Wetlands including fens, bogs, grazing marsh etc.,Peri-urban and urban greenspaces		Yes	Yes	Understanding past ecology, and changes from the fossil record.	Yes	Very helpful	Could be helpful	Could be helpful	Very helpful	Could be helpful	Not helpful	Could be helpful	Used to try to determine historic range for UK species.	Fossil finds records.										1	4	6	5	8	7	2	3	Yes, the tool seems broken, can't undo clicks and the order appeared pre-determined. Disregard the above.
2023-03-09 15:27:16	2023-03-15 08:03:04	IP Address	48	491747	False	2023-03-22 08:03:05	R_1kYLcJXRqmO24Wq	anonymous	EN	Yes	d	Local government (e.g. borough or county council)		15+ years	Advisory role inc. planning, land management, etc.		Wetlands including fens, bogs, grazing marsh etc.		No	No		No
2023-03-22 08:46:02	2023-03-22 08:53:35	IP Address	100	452	True	2023-03-22 08:53:35	R_28CVpXpQ5X1QnHh	anonymous	EN	Yes	Assistant Outreach Adviser	Environmental NGO (e.g. Wildlife Trust, RSPB)		0-5 years	Surveying species and habitats,GIS and site mapping,Advisory role inc. planning, land management, etc.		Woodlands, ancient and semi-natural,Other	Farmland converting to agroforestry and regenerative farming	Yes	No		No										Very helpful	Very helpful	Very helpful	Very helpful	Very helpful	Very helpful	Could be helpful	Definitely yes	To identify past management and presence of fauna and flora in ancient woodlands converted to plantation (PAWS). This would help with our restoration process. Also, perhaps on farmland where a landowner wants to take the site back to a more natural state.	4	2	6	5	8	7	3	1
2023-03-22 08:53:13	2023-03-22 09:08:56	IP Address	100	942	True	2023-03-22 09:08:56	R_ZeIwSXPPFwwEwPD	anonymous	EN	Yes	Biodiversity Officer	Statutory body (e.g. DEFRA, Natural England)		0-5 years	Writing site management plans,Delivering practical conservation and land management,Surveying species and habitats,GIS and site mapping,Public engagement inc. education, citizen science, etc.,Advisory role inc. planning, land management, etc.		Standing open waters and rivers,Wetlands including fens, bogs, grazing marsh etc.		Yes	Yes	Looks at fossil records which can be used to inform how an ecosystem has changed over time and how it will respond to change in the future.	Yes	Very helpful	Very helpful	Very helpful	Very helpful	Very helpful	Very helpful	Very helpful	I did a small amount of research as part of my MSc in Ecological Restoration. I looked at the practical uses of paleoecology in wetland restoration.	Academic journals; past global changes magazine										2	1	7	3	6	4	5	8	A database of case studies of how it has been used in different ecosystem settings would be welcome. Past Global Changes is good but a bit inaccessible to practitioners.
2023-03-22 12:45:26	2023-03-22 12:56:25	IP Address	100	659	True	2023-03-22 12:56:26	R_2Pzj7jJYORRFPqu	anonymous	EN	Yes	Land adviser	Environmental NGO (e.g. Wildlife Trust, RSPB)		15+ years	GIS and site mapping,Advisory role inc. planning, land management, etc.		Woodlands, ancient and semi-natural,Heathlands and acid grasslands,Neutral and calcareous grasslands		Yes	Maybe	Something like the study of organisms that were once present in environments, what is there now and what is missing.	No										Very helpful	Very helpful	Could be helpful	Very helpful	Could be helpful	Very helpful	Could be helpful	Definitely yes	For example to support habitat restoration schemes (evidence / buy in) and provide meaningful targets for restoration of species presence.	4	3	7	6	8	5	1	2
2023-03-22 15:55:19	2023-03-22 16:55:37	IP Address	100	3618	True	2023-03-22 16:55:38	R_sTfnFrEPF0t3TOh	anonymous	EN	Yes	Community Engagement Manager	Environmental NGO (e.g. Wildlife Trust, RSPB)		15+ years	Strategy and policy,Public engagement inc. education, citizen science, etc.		Woodlands, ancient and semi-natural,Heathlands and acid grasslands,Neutral and calcareous grasslands,Standing open waters and rivers,Coastal, saltmarsh and marine,Peri-urban and urban greenspaces		Yes	Maybe	Something to do with fossils of plants and animals?	No										Very helpful	Very helpful	Very helpful	Very helpful	Very helpful	Very helpful	Very helpful	Probably yes		8	3	2	4	5	6	1	7
2023-03-23 08:31:24	2023-03-23 08:42:33	IP Address	100	668	True	2023-03-23 08:42:33	R_2b1QGqVKiB4zQDn	anonymous	EN	Yes	Biodiversity officer	Local government (e.g. borough or county council)		0-5 years	Writing site management plans,Strategy and policy,Public engagement inc. education, citizen science, etc.,Advisory role inc. planning, land management, etc.		Neutral and calcareous grasslands,Standing open waters and rivers,Wetlands including fens, bogs, grazing marsh etc.,Peri-urban and urban greenspaces		Yes	No		No										Could be helpful	Could be helpful	Could be helpful	Very helpful	Could be helpful	Very helpful	Could be helpful	Probably yes	It may help to provide justification and reasoning in setting restoration objectives for those sites that are already somewhat species-rich (i.e. not starting from scratch) but where historic, slow-burning decline is known or suspected	1	2	6	3	7	4	5	8	The 'obvious' sitesin which to most intensely focus my conservation efforts are those with a degree of protection already, particularly, in my case, the SSSIs I manage. Any changes to management practices on the basis of palaeoecological findings would therefore need to satisfy statutory bodies (e.g NE) as to their relevance to today. Perhaps it betrays my lack of knowledge around the subject, bu…
2023-03-23 11:20:26	2023-03-23 11:41:28	IP Address	100	1261	True	2023-03-23 11:41:28	R_xgZdLmmbzcH2Zd7	anonymous	EN	Yes	West Surrey Badger Group volunteer	Other	Local badger group affiliated to the Badger Trust	15+ years	Surveying species and habitats		Woodlands, ancient and semi-natural,Heathlands and acid grasslands		Yes	Maybe	The scientific study of ancient ecosystems through fossils.	No										Could be helpful	Could be helpful	Very helpful	Could be helpful	Could be helpful	Very helpful	Could be helpful	May or may not	Could add weight to protecting wildlife habitats particularly for badgers.	5	2	3	1	7	6	4	8	Introducing palaeoecological study would be a low priority subject as the group does not have enough people on the ground for current badger protection at the moment.
2023-03-23 12:01:59	2023-03-23 12:17:18	IP Address	100	919	True	2023-03-23 12:17:19	R_1duczAs6n9XjpTA	anonymous	EN	Yes	Ecological consultant	Other	Also academic	10-15 years	Writing site management plans,Surveying species and habitats		Woodlands, ancient and semi-natural,Peri-urban and urban greenspaces		Yes	Yes	The study of ancient (historic/prehistoric) environments through investigation of evidence left behind eg pollen in soil cores, ancient DNA.	Yes	Very helpful	Could be helpful	Could be helpful	Could be helpful	Could be helpful	Could be helpful	Could be helpful	Studied during Masters degree in ecology											1	2	5	7	4	3	6	8	I'm not sure I understand the above list!
2023-03-23 17:57:52	2023-03-23 18:16:11	IP Address	100	1098	True	2023-03-23 18:16:12	R_PMQUhgtuOlN1Hgd	anonymous	EN	Yes	Volunteer Surrey Wildlife Trust	Environmental NGO (e.g. Wildlife Trust, RSPB)		0-5 years	Delivering practical conservation and land management,Surveying species and habitats		Heathlands and acid grasslands,Neutral and calcareous grasslands		Yes	Maybe	Use of historical sample data to determine original/ancient/previous ecosystem constituents and relationships, eg pollen analysis to direct reforestation.	No										Very helpful	Could be helpful	Could be helpful	Could be helpful	Not helpful	Very helpful	Could be helpful	Definitely yes	Determining species loss and dates of species introductions with a view to constructing targets for conservation strategies	2	4	8	1	7	6	5	3
2023-03-23 18:38:16	2023-03-23 18:57:13	IP Address	100	1137	True	2023-03-23 18:57:14	R_1cUGqinKtdEYsW8	anonymous	EN	Yes	Head of Geography	Environmental NGO (e.g. Wildlife Trust, RSPB)		15+ years	Public engagement inc. education, citizen science, etc.		Woodlands, ancient and semi-natural,Heathlands and acid grasslands		Yes	Yes	Reconstructing vegetation patterns in the past and the relationship plants and animals have with environmental conditions	No										Very helpful	Very helpful	Very helpful	Very helpful	Very helpful	Very helpful	Very helpful	Definitely yes	Knowing how best to conserve existing ecosystems given the issues linked with climate change and the reduction in all aspects of British wildlife.	5	7	4	3	8	1	2	6	Risk assessments can be problematic. Lack of environmental knowledge by some of the key decision makers.
2023-03-24 06:31:00	2023-03-24 07:05:35	IP Address	100	2075	True	2023-03-24 07:05:35	R_2PqhM4Vxzp99Pia	anonymous	EN	Yes	Conservation volunter	Environmental NGO (e.g. Wildlife Trust, RSPB)		10-15 years	Delivering practical conservation and land management,Surveying species and habitats		Woodlands, ancient and semi-natural,Neutral and calcareous grasslands		No	No		No										Could be helpful	Could be helpful	Very helpful	Could be helpful	Very helpful	Could be helpful	Very helpful	Definitely yes	IN principle, the more information an organisation has, naturally the better informed any decisions will be. Perhaps particularly in understanding ecology, where humans have made so many mistakes up to now due to a lack of understanding of complex natural relationships. In terms of a particular site, may be a quick way to better understand history that has been lost, without the need for decades …	6	5	4	2	7	8	1	3	I'm not a decision-maker, and just a volunteer, so in reality I don't have the insight to answer the above question.
2023-03-24 17:47:36	2023-03-24 18:26:24	IP Address	100	2328	True	2023-03-24 18:26:24	R_28BD5gClC8YOETK	anonymous	EN	Yes	Voluntary Reserve Manager	Environmental NGO (e.g. Wildlife Trust, RSPB)		15+ years	Writing site management plans,Delivering practical conservation and land management,Surveying species and habitats,GIS and site mapping,Public engagement inc. education, citizen science, etc.		Woodlands, ancient and semi-natural,Neutral and calcareous grasslands,Other	Scrub	Yes	Maybe	The study of past habitats, species and ecosystems.	No										Could be helpful	Could be helpful	Could be helpful	Could be helpful	Could be helpful	Could be helpful	Could be helpful	Definitely yes	It all depends upon from what period any data on previous species/habitats can be gathered. Data from the more recent past may be more helpful in guiding future management. However, data from periods much longer ago may be INTERESTING but it may be less relevant to current/future objectives for a site as much more is likely to have changed in the longer intervening period. E.g. there are likely t…	2	3	6	1	7	5	4	8	Uncertainty about how information on species/habitats from longer ago may be relevant to current/future management practices.
2023-03-19 17:23:27	2023-03-27 16:01:13	IP Address	100	682666	True	2023-03-27 16:01:14	R_1IAUuzgnEQg19Ks	social	EN	Yes	BERS Intern	Private (e.g. consultancy)		0-5 years	Surveying species and habitats,GIS and site mapping,Other	Report writing	Woodlands, ancient and semi-natural,Peri-urban and urban greenspaces		Yes	Maybe	Ecology through the lens of archaeology	No										Very helpful	Could be helpful	Very helpful	Very helpful	Could be helpful	Could be helpful	Could be helpful	Probably yes	As an extension of biological records centres to help inform consultants on local conditions	3	4	7	6	2	1	5	8
2023-03-28 10:38:28	2023-03-28 10:51:39	IP Address	100	790	True	2023-03-28 10:51:40	R_81D9sf9qz4JkzmN	anonymous	EN	Yes	Ecology Consultant	Private (e.g. consultancy)		15+ years	Surveying species and habitats,Senior leadership,Advisory role inc. planning, land management, etc.		Neutral and calcareous grasslands,Wetlands including fens, bogs, grazing marsh etc.,Coastal, saltmarsh and marine,Peri-urban and urban greenspaces		Yes	Yes	The work inspired by Harry Godwin (and my old lecturer Judith Turner at Durham) especially assessing vegetation assemblages through the various Pleistocene interglacials and so I think if it as the work to understand the ebb and flow of climate sensitive, species within temperate ecosystems	No										Could be helpful	Very helpful	Could be helpful	Could be helpful	Not helpful	Could be helpful	Could be helpful	May or may not	I currently work for Middle East University from the UK (with many years in the UK ecology) so it is not relevant to my current work. However, the subject ought to be very relevant to many UK rewilding and area management schemes or modelling of such, especially in relation to long term climate change.	1	2	6	3	5	4	7	8
2023-03-28 10:37:13	2023-03-28 10:55:49	IP Address	100	1116	True	2023-03-28 10:55:50	R_3oLOAdsVs0N6cvS	anonymous	EN	Yes	Ecological consultant	Private (e.g. consultancy)		15+ years	Writing site management plans,Delivering practical conservation and land management,Surveying species and habitats,GIS and site mapping,Advisory role inc. planning, land management, etc.		Woodlands, ancient and semi-natural,Heathlands and acid grasslands,Neutral and calcareous grasslands,Wetlands including fens, bogs, grazing marsh etc.,Coastal, saltmarsh and marine		Yes	Yes	The study of past ecologies through the study of surviving evidence such as geomorphological features, fossil and sub fossil remains and other features	Yes	Very helpful	Could be helpful	Could be helpful	Could be helpful	Could be helpful	Could be helpful	Could be helpful	Personal research into sub Fossil wood deposits in a now treeless upland setting to suggest possible future directions of habitat development.	PhD papers. General texts.										2	3	7	4	8	6	1	5
2023-03-21 09:24:17	2023-03-21 09:33:47	IP Address	72	569	False	2023-03-28 11:03:24	R_6FIqf1gn86YnF0l	social	EN	Yes	Environment Director	Private (e.g. consultancy)		15+ years	Senior leadership		Woodlands, ancient and semi-natural,Heathlands and acid grasslands,Neutral and calcareous grasslands,Standing open waters and rivers,Wetlands including fens, bogs, grazing marsh etc.,Peri-urban and urban greenspaces,Upland and montane		Yes	Yes	Looking at lost or proxy species to reintroduce or introduce to better manage ecosystems. Moving towards functioning more naturally to reverse biodiversity loss.	No										Could be helpful	Could be helpful	Could be helpful	Very helpful	Could be helpful	Very helpful	Could be helpful	Definitely yes	We need to identify how to allow natural processes to manage large landscapes in order to reverse biodiversity loss.
2023-03-28 10:42:21	2023-03-28 11:25:22	IP Address	100	2580	True	2023-03-28 11:25:23	R_3R4r4vmafDvccHB	anonymous	EN	Yes	Ecologist - researcher (self employed)	Local government (e.g. borough or county council)		15+ years	Writing site management plans,Delivering practical conservation and land management,Surveying species and habitats,Public engagement inc. education, citizen science, etc.,Advisory role inc. planning, land management, etc.,Other	ecological research	Woodlands, ancient and semi-natural,Heathlands and acid grasslands,Neutral and calcareous grasslands,Wetlands including fens, bogs, grazing marsh etc.		Yes	Yes	The study of past environments, especially in prehistory, using archaeological and ecological methods to better understand the habitats and species that were present and their ecologies across different epochs.	Yes	Could be helpful	Very helpful	Very helpful	Could be helpful	Could be helpful	Could be helpful	Could be helpful	During the writing of my PhD thesis on ancient woodland I included references to past landscape condition as a way of demonstrating how woods had changed, particularly in relation to climate and anthropogenic effects. I also discussed the potential use of land snails as a study taxon with Dr Mike Allen (a very good palaoecologist) as they are valuable in determining habitat conditions i.e., open …	Book - Molluscs in Archaeology by Dr Mike Allen Book - 10,000 years on a chalkland farm, Dr Martin Green Academic journals; French, C., Lewis, H., Allen, M.J., Scaife, R.G., Green, M., Gardiner, J. and Gdaniec, K., 2003. Archaeological and palaeo-environmental investigations of the upper Allen valley, Cranborne Chase, Dorset (1998–2000): a new model of earlier Holocene landscape development. In P…										5	6	7	3	8	4	1	2	I have ranked these although I enjoy networking and finding out who has done research that was relevant and of considerable interest to me. I think ecologists require training in understanding the resources that might be available to them when undertaking their assessments. Conversely, I think engagement between Palaeologists and Ecologists and land-managers would be beneficial. As an example, wh…
2023-03-28 11:58:06	2023-03-28 12:02:44	IP Address	100	278	True	2023-03-28 12:02:44	R_3elgGDJmeXzLptv	anonymous	EN	Yes	Ecologist	Private (e.g. consultancy)		0-5 years	Surveying species and habitats,GIS and site mapping		Woodlands, ancient and semi-natural,Neutral and calcareous grasslands,Peri-urban and urban greenspaces		No	No		No										Very helpful	Very helpful	Very helpful	Could be helpful	Could be helpful	Could be helpful	Not helpful	Definitely yes		7	6	4	2	5	3	1	8
2023-03-28 12:27:01	2023-03-28 12:42:22	IP Address	100	921	True	2023-03-28 12:42:23	R_R4Z8iG96hy9mPV7	anonymous	EN	Yes	Senior Officer Land Management	Statutory body (e.g. DEFRA, Natural England)		15+ years	Writing site management plans,Delivering practical conservation and land management,Surveying species and habitats,Public engagement inc. education, citizen science, etc.,Advisory role inc. planning, land management, etc.		Woodlands, ancient and semi-natural,Neutral and calcareous grasslands,Standing open waters and rivers,Wetlands including fens, bogs, grazing marsh etc.		Yes	Yes	Studying the ecological conditions of the past by using preserved materials to indicate environmental conditions of the time. Typically in the northern hemisphere of the holocene	Yes	Could be helpful	Very helpful	Very helpful	Could be helpful	Could be helpful	Very helpful	Could be helpful	Supervised a PhD study at Cors Caron National Nature Reserve using palaeoecology to look at the development of the raised bogs. Using this information to estimate what the bog surface topography and vegetation might be in a pristine system. PhD hosted by the University of Southampton.	NRW has a comprehensive library service										4	2	7	3	8	5	6	1	Palaeoecology is much more commonly used in certain habitats such as mire systems. I can be perceived as an academic area of work with limited use to current site managers.
2023-03-28 11:33:50	2023-03-28 12:42:34	IP Address	100	4123	True	2023-03-28 12:42:34	R_1IaWzrjxUP7OtNf	anonymous	EN	Yes	Technical Director	Private (e.g. consultancy)		15+ years	Surveying species and habitats,Advisory role inc. planning, land management, etc.		Woodlands, ancient and semi-natural,Neutral and calcareous grasslands,Standing open waters and rivers,Peri-urban and urban greenspaces		Yes	Yes	The study of ancient ecosystems	No										Could be helpful	Very helpful	Could be helpful	Could be helpful	Could be helpful	Could be helpful	Could be helpful	Probably yes	As a consultant ecologist, most of my time is spent trying to mitigate development impacts on species and habitats that are present now. But there may be opportunities for the design/location/species composition etc. of habitat creation, or for the management of retained habitats, to be informed by data from the past.	6	2	5	1	7	3	4	8
2023-03-28 10:38:03	2023-03-28 14:05:35	IP Address	100	12452	True	2023-03-28 14:05:36	R_ZsIesmCUn47YlXj	anonymous	EN	Yes	Ecological consultant	Private (e.g. consultancy)		15+ years	Surveying species and habitats,Public engagement inc. education, citizen science, etc.		Woodlands, ancient and semi-natural,Heathlands and acid grasslands,Neutral and calcareous grasslands		Yes	Maybe	Using fossils and ichnofossils to understand the environment/habitat at the time the creatures were alive.	No										Could be helpful	Could be helpful	Not helpful	Could be helpful	Could be helpful	Could be helpful	Very helpful	Probably yes	To avoid shifting baselines - understanding historical ecosystems must be important in present day conservation - but is this 'recent' fossil evidence - from thousands rather than 100s of thousands or million years old? when ticking the boxes above I assumed 'recent fossil evidence'	4	3	5	2	7	6	1	8	I have ranked these on how I think ecologists in general might react, as there is no opportunity to use palaeocology in the work that I now undertake.
2023-03-28 16:01:59	2023-03-28 16:11:49	IP Address	100	589	True	2023-03-28 16:11:49	R_1KshpFbdzmdyCKy	anonymous	EN	Yes	Project officer	Other	an organic farm (biodiversity project officer)	5-10 years	Writing site management plans,Delivering practical conservation and land management,Surveying species and habitats,GIS and site mapping,Strategy and policy,Public engagement inc. education, citizen science, etc.,Advisory role inc. planning, land management, etc.		Woodlands, ancient and semi-natural,Heathlands and acid grasslands,Neutral and calcareous grasslands,Standing open waters and rivers,Wetlands including fens, bogs, grazing marsh etc.,Peri-urban and urban greenspaces		Yes	Maybe	studying past ecosystems, or aspects of them (e.g. pollen data)	No										Could be helpful	Could be helpful	Could be helpful	Could be helpful	Could be helpful	Could be helpful	Could be helpful	Definitely yes	To be honest, I'm not sure how useful or not this would be- therefore I'd be interested to understand this topic better- I think that would then allow me to better understand how useful it could be	5	1	3	2	7	6	4	8
2023-03-28 16:51:28	2023-03-28 17:10:37	IP Address	100	1149	True	2023-03-28 17:10:37	R_W7CsBg55mH9W00x	anonymous	EN	Yes	Director Surrey Nature Partnership part time and Director of TriloByte Land Management	Environmental NGO (e.g. Wildlife Trust, RSPB)		15+ years	Writing site management plans,Delivering practical conservation and land management,Strategy and policy,Senior leadership,Public engagement inc. education, citizen science, etc.		Woodlands, ancient and semi-natural,Heathlands and acid grasslands,Neutral and calcareous grasslands,Standing open waters and rivers,Peri-urban and urban greenspaces		Yes	Maybe	the ecology of extinct animals (fossilised) and plants, that helps to see how they they have evolved and potentially are likely to further evolve	No										Could be helpful	Very helpful	Very helpful	Very helpful	Could be helpful	Could be helpful	Could be helpful	Definitely yes	It could be used to show how the area has changed and adapations to those changes which may influence how the area is managed to restore lost species bearing in mind the changes occurring through climate change and changes in surrounding landuse. It may also be helpful to know what has been present in the past to start to assess if restoration to that land use is possible or desirable with the ch…	4	3	6	2	7	5	1	8
2023-03-21 15:43:52	2023-03-21 16:25:28	IP Address	48	2495	False	2023-03-28 17:25:29	R_1Qxy5A2MrogHkPB	anonymous	EN	Yes	Director of Conservation Policy and Evidence	Environmental NGO (e.g. Wildlife Trust, RSPB)		15+ years	Strategy and policy,Senior leadership		Woodlands, ancient and semi-natural,Heathlands and acid grasslands,Neutral and calcareous grasslands,Standing open waters and rivers,Wetlands including fens, bogs, grazing marsh etc.,Coastal, saltmarsh and marine		Yes	Maybe	Looking back at what we can learn about ecology using fossil remains and other indicators of biotic systems in pre historic times.	Yes
2023-03-28 18:03:34	2023-03-28 18:10:45	IP Address	100	431	True	2023-03-28 18:10:45	R_C7VDiQWtvQ8oS0F	social	EN	Yes	Catchment Partnership Manager	Environmental NGO (e.g. Wildlife Trust, RSPB)		0-5 years	Strategy and policy		Standing open waters and rivers		Yes	Maybe	Looking at historic records to decide on current ecological conditions/baselines?	No										Very helpful	Very helpful	Could be helpful	Very helpful	Could be helpful	Could be helpful	Very helpful	May or may not		5	2	6	3	7	1	4	8
2023-03-28 23:53:14	2023-03-29 00:13:24	IP Address	100	1209	True	2023-03-29 00:13:24	R_1YRY99wM8cYn6IV	anonymous	EN	Yes	Technical Director - Ecology	Private (e.g. consultancy)		15+ years	Surveying species and habitats,Senior leadership,Advisory role inc. planning, land management, etc.		Woodlands, ancient and semi-natural,Neutral and calcareous grasslands,Standing open waters and rivers,Peri-urban and urban greenspaces		Yes	Maybe	Does it relate to the seedbank present in the soil?	No										Very helpful	Very helpful	Very helpful	Very helpful	Very helpful	Very helpful	Very helpful	Definitely yes	Likely useful application in achieving biodiversity net gain targets and assessing ecosystem services to help form nature recovery strategies	5	1	4	2	8	6	3	7
2023-03-29 01:41:04	2023-03-29 02:05:22	IP Address	100	1458	True	2023-03-29 02:05:22	R_Oa5HWpPXTsoM5YB	anonymous	EN	Yes	Senior Ecologist	Private (e.g. consultancy)		15+ years	Writing site management plans,Surveying species and habitats,GIS and site mapping		Woodlands, ancient and semi-natural,Heathlands and acid grasslands,Neutral and calcareous grasslands,Standing open waters and rivers,Wetlands including fens, bogs, grazing marsh etc.,Coastal, saltmarsh and marine,Peri-urban and urban greenspaces,Upland and montane		Yes	Yes	Understanding the historical ecology of a site / location that may be used to inform current action	Yes	Very helpful	Very helpful	Could be helpful	Could be helpful	Could be helpful	Could be helpful	Very helpful	We were identifying old pollen records within soil samples to determine past land use (archeological based), this indirectly provided details of the historical species present / habitats present and that were potentially viable now if planted with similar vegetation types. This was discussed but didn’t go any further noting this was many years before the recent re-wilding focus. But gave us valid…	Had direct access to archaeologists. Papers would have been sought If required/ useful.										3	2	6	4	8	1	5	7	Can be seen as ‘too scientific’ for modern consultancy processes e.g. PEA, ECIA that inform developments - no requirement to do this so not done despite how useful it can be.
2023-03-29 11:14:36	2023-03-29 12:02:54	IP Address	100	2898	True	2023-03-29 12:02:55	R_21vafgC1KCpm7pD	anonymous	EN	Yes	Senior Ecologist	Private (e.g. consultancy)		10-15 years	Writing site management plans,Surveying species and habitats,GIS and site mapping,Strategy and policy		Woodlands, ancient and semi-natural,Neutral and calcareous grasslands,Standing open waters and rivers,Other	farmland, arable and pasture	Yes	Yes	The study of the history of ecology. For instance analysing ancient pollen grains to find out what plants were growing on the surface through time.	Yes	Very helpful	Very helpful	Could be helpful	Very helpful	Very helpful	Very helpful	Could be helpful	A member of the team undertaking a 'dodo dig' of a marsh site in Mauritius. |Researchers there and on Rodridges Island used analysing pollen to find out what the lost habitat was like in the past. My UK ecology work only covers the historic OS maps looking for evidence of woodland, trees, field boundaries and ponds.	As mentioned, I only use historic mapping (first or second edition OS maps) to find out if ponds, woodland and trees were present in a landscape during the late 1800s and through the 1900s.										3	2	6	5	7	4	1	8	National policy: currently DEFRA Biodiversity Net Gain only values lowland habitats lost from the early mid 1900s such as hay meadows, and other rarieties, which is and will lead to an attempt to establish generic lowland habitats rather than having a focus on what the local geology and conditions would have been like, as well as local human cultural practices, which if historical (looking at loc…
2023-03-29 16:50:34	2023-03-29 16:59:02	IP Address	100	508	True	2023-03-29 16:59:03	R_3itoIc5FbRDnAWX	anonymous	EN	Yes	Senior Countryside Ranger	Local government (e.g. borough or county council)		15+ years	Delivering practical conservation and land management,Public engagement inc. education, citizen science, etc.		Woodlands, ancient and semi-natural,Neutral and calcareous grasslands,Wetlands including fens, bogs, grazing marsh etc.,Peri-urban and urban greenspaces		Yes	Maybe	Historic / prehistoric relationships between organisms and their environments.	No										Could be helpful	Could be helpful	Very helpful	Could be helpful	Could be helpful	Could be helpful	Not helpful	May or may not		3	1	4	7	8	2	6	5
2023-03-29 19:41:02	2023-03-29 19:54:49	IP Address	100	827	True	2023-03-29 19:54:50	R_STStvB3db3TLhPb	anonymous	EN	Yes	Nature Based Solutions Technical Assistant	Environmental NGO (e.g. Wildlife Trust, RSPB)		0-5 years	Writing site management plans,Delivering practical conservation and land management,Surveying species and habitats,GIS and site mapping,Strategy and policy,Advisory role inc. planning, land management, etc.		Woodlands, ancient and semi-natural,Neutral and calcareous grasslands,Wetlands including fens, bogs, grazing marsh etc.,Coastal, saltmarsh and marine		Yes	Yes	Looking at the insight we can gain from fossils about ancient ecosystems and their composition.	Yes	Very helpful	Very helpful	Could be helpful	Very helpful	Very helpful	Very helpful	Could be helpful	I undertook a research project in my final years of my conservation biology and ecology BSc. I analysed megaspores from a Yorkshire coal seam to help reconstruct the climate in the Carboniferous.	Used coal samples from which I analysed megaspores and identified them to a genus/species level.										3	6	4	1	8	5	2	7
2023-03-29 21:25:33	2023-03-29 21:33:18	IP Address	100	465	True	2023-03-29 21:33:19	R_2asP4ekDAfujpek	anonymous	EN	Yes	Senior Ecologist	Private (e.g. consultancy)		5-10 years	Writing site management plans,Surveying species and habitats,GIS and site mapping,Advisory role inc. planning, land management, etc.		Woodlands, ancient and semi-natural,Heathlands and acid grasslands,Neutral and calcareous grasslands,Standing open waters and rivers,Peri-urban and urban greenspaces		No	Maybe	Study of historical information fossil/geological to paint a picture of what habitats could have been	No										Could be helpful	Could be helpful	Very helpful	Very helpful	Could be helpful	Very helpful	Could be helpful	Probably yes	Could be use to confirm habitat types.	2	5	6	7	1	8	3	4
2023-03-30 17:31:22	2023-03-30 17:38:34	IP Address	100	432	True	2023-03-30 17:38:35	R_2Ymj2djizQlwQbB	anonymous	EN	Yes	Volunteer conservation worker	Environmental NGO (e.g. Wildlife Trust, RSPB)		0-5 years	Delivering practical conservation and land management		Woodlands, ancient and semi-natural		No	Maybe	An intersection of environment, fauna and flora and humans.	No										Very helpful	Very helpful	Very helpful	Could be helpful	Could be helpful	Could be helpful	Could be helpful	May or may not		4	3	7	2	8	1	5	6
2023-03-30 17:39:53	2023-03-30 17:55:59	IP Address	100	966	True	2023-03-30 17:56:00	R_uy2rWM4tGhJMVih	anonymous	EN	Yes	Ex headteacher now retired and volunteering for SWT	Environmental NGO (e.g. Wildlife Trust, RSPB)		0-5 years	Other	Volunteering	Heathlands and acid grasslands		Yes	Maybe	Using fossil records to draw a picture of how current habitats looked in previous times	No										Very helpful	Very helpful	Could be helpful	Very helpful	Could be helpful	Very helpful	Could be helpful	Definitely yes	Purely interested from a scientific point of view. My degrees are in zoology and biochemistry and I have always been interested in wildlife and ecosystems	1	2	6	4	5	7	3	8
2023-03-23 17:29:58	2023-03-23 17:38:35	IP Address	72	516	False	2023-03-30 18:38:41	R_1mkPOZbd0z5dm4G	anonymous	EN	Yes	conservation volunteer	Environmental NGO (e.g. Wildlife Trust, RSPB)		15+ years	Delivering practical conservation and land management,Surveying species and habitats		Heathlands and acid grasslands		Yes	Maybe	study of long-term (eg &gt;1000 ys) interactions between plants, animals, invertebrates, climate (etc) in a general locale	No										Could be helpful	Very helpful	Very helpful	Could be helpful	Not helpful	Could be helpful	Not helpful	May or may not	In principle, I'd be interested but - based on the table above - not sure that I understand the terminology/jargon
2023-03-23 19:04:59	2023-03-23 19:07:59	IP Address	48	180	False	2023-03-30 20:08:00	R_UEnW0zvuAg7cU6t	anonymous	EN	Yes	Volunteer	Environmental NGO (e.g. Wildlife Trust, RSPB)		0-5 years	Delivering practical conservation and land management,Surveying species and habitats		Woodlands, ancient and semi-natural,Heathlands and acid grasslands		No	No		No
2023-03-30 21:31:46	2023-03-30 21:47:02	IP Address	100	915	True	2023-03-30 21:47:02	R_246mnZgaWX55SQs	anonymous	EN	Yes	Senior Lecturer	Other	Education/research	15+ years	Surveying species and habitats,Public engagement inc. education, citizen science, etc.		Peri-urban and urban greenspaces		Yes	Yes	Understanding past ecosystems and species/ecological interactions	No										Very helpful	Very helpful	Very helpful	Very helpful	Very helpful	Very helpful	Very helpful	Definitely yes	Understanding how species responded to past climatic changes and understanding past species distributions and how these link to current distributions.	6	2	8	5	7	3	4	1
2023-03-23 21:41:27	2023-03-23 21:46:11	IP Address	40	284	False	2023-03-30 22:46:14	R_CdkGsv2bLRcmHxD	anonymous	EN	Yes	Occasional Volunteer with surrey wildlife.	Other	Volunteer only	0-5 years	Other	Volunteer	Other	Unsure	No	No
2023-03-24 17:13:53	2023-03-24 17:22:27	IP Address	80	514	False	2023-03-31 18:22:28	R_2B3b0DpVVf0Ynvf	anonymous	EN	Yes	Environmental Consultant (Retired)	Private (e.g. consultancy)		15+ years	Other	Technical consultancy on energy projects	Other	General	No	No		No										Very helpful	Very helpful	Could be helpful	Could be helpful	Could be helpful	Could be helpful	Not helpful	Definitely not	I am retired. No work to support	2	1	4	7	6	5	3	8
2023-03-24 17:33:10	2023-03-24 17:36:15	IP Address	48	184	False	2023-03-31 18:36:15	R_3lxZ4pAJ19GYUbI	anonymous	EN	Yes	Headteacher	Local government (e.g. borough or county council)		15+ years	Public engagement inc. education, citizen science, etc.		Peri-urban and urban greenspaces		No	No		No
2023-03-31 22:48:20	2023-03-31 23:05:57	IP Address	100	1056	True	2023-03-31 23:05:57	R_3P77nBFeId6C9uL	anonymous	EN	Yes	Nature Reserve and Grounds Maintenance person	Private (e.g. consultancy)		0-5 years	Delivering practical conservation and land management,Surveying species and habitats,Public engagement inc. education, citizen science, etc.		Heathlands and acid grasslands		No	No		No										Could be helpful	Could be helpful	Very helpful	Very helpful	Not helpful	Very helpful	Could be helpful	May or may not	I work at a natural burial ground where only plant species native to the area are allowed to be planted in tribute, if older records ie non-written could be proved a more diverse assemblage of flora may be introduced so increasing biodiversity	8	3	7	2	4	1	6	5
2023-04-02 06:17:55	2023-04-02 06:23:17	IP Address	100	322	True	2023-04-02 06:23:17	R_1jjhTpRgWRqpOM7	anonymous	EN	Yes	Director ecology firm	Private (e.g. consultancy)		15+ years	Writing site management plans,Surveying species and habitats,GIS and site mapping,Strategy and policy,Senior leadership,Advisory role inc. planning, land management, etc.		Woodlands, ancient and semi-natural,Neutral and calcareous grasslands,Standing open waters and rivers,Wetlands including fens, bogs, grazing marsh etc.,Peri-urban and urban greenspaces		Yes	No		No										Could be helpful	Very helpful	Could be helpful	Could be helpful	Could be helpful	Very helpful	Very helpful	Probably yes		8	4	7	1	6	2	3	5
2023-04-03 15:10:01	2023-04-03 15:19:56	IP Address	100	595	True	2023-04-03 15:19:57	R_wZfSa4p1N6jmcQV	anonymous	EN	Yes	Senior Ecologist	Private (e.g. consultancy)		15+ years	Writing site management plans,Delivering practical conservation and land management,Surveying species and habitats,GIS and site mapping,Senior leadership,Advisory role inc. planning, land management, etc.		Woodlands, ancient and semi-natural,Heathlands and acid grasslands,Neutral and calcareous grasslands,Standing open waters and rivers,Peri-urban and urban greenspaces		Yes	Yes	Understanding the historical ecology of an area from analysing fossil or other similarly preserved plant and animal remains (such as in bogs).	Yes	Could be helpful	Could be helpful	Could be helpful	Could be helpful	Very helpful	Could be helpful	Could be helpful	Understanding the historical conditions at a previously drained site helped form restoration proposals for rewetting and revegetating the site to restore the original habitat.	Colleagues provided the information.										3	2	8	7	4	6	1	5
2023-04-04 08:57:28	2023-04-04 09:11:48	IP Address	100	859	True	2023-04-04 09:11:48	R_3D71m2xW2H3mPWa	anonymous	EN	Yes	conservation scientist	Environmental NGO (e.g. Wildlife Trust, RSPB)		5-10 years	Other	research to inform conservation practice	Other	tropical forest landscapes	Yes	Maybe	building understanding of past ecosystems or environmental conditions from evidence like fossils / cores that show what species were around at what times in earths history	No										Could be helpful	Could be helpful	Could be helpful	Could be helpful	Could be helpful	Could be helpful	Not helpful	May or may not	I think it would be interesting as context, and provide more evidence-based narratives about peoples' historic roles in the landscapes I work in, that could potentially link to the general way we value/understand the roles of indigenous cultures in the landscape today. However, in general the conservation problems that my work concerns with (how to foster socially and environmentally sustainable …	3	2	5	4	6	1	7	8
2023-04-04 10:34:34	2023-04-04 10:43:23	IP Address	100	529	True	2023-04-04 10:43:24	R_UYG9spJi5Ez5jJ7	anonymous	EN	Yes	Conservation advisor	Statutory body (e.g. DEFRA, Natural England)		15+ years	Delivering practical conservation and land management,Surveying species and habitats,Advisory role inc. planning, land management, etc.		Woodlands, ancient and semi-natural,Heathlands and acid grasslands,Neutral and calcareous grasslands,Wetlands including fens, bogs, grazing marsh etc.		Yes	Yes	reconstruction of past environments using evidence such as pollen analysis	Yes	Could be helpful	Could be helpful	Could be helpful	Could be helpful	Not helpful	Very helpful	Not helpful	Have used outputs from pollen analysis at fen sites to understand how the system developed and changed over time, helping to understand better how the system functions and helping provide a clear vision for habitat restoration, though not necessarily seeking to re-create back to a former state.	PhD studies and academic papers										8	2	6	4	7	5	1	3
2023-04-04 18:40:13	2023-04-04 19:26:26	IP Address	100	2772	True	2023-04-04 19:26:27	R_vuWsFYiPWv2nfrP	anonymous	EN	Yes	Director - Civil Engineer now volunteer	Environmental NGO (e.g. Wildlife Trust, RSPB)		0-5 years	Delivering practical conservation and land management		Woodlands, ancient and semi-natural,Heathlands and acid grasslands,Wetlands including fens, bogs, grazing marsh etc.		No	No		No										Very helpful	Very helpful	Could be helpful	Could be helpful	Could be helpful	Very helpful	Could be helpful	Probably yes	Current environmental management is still an evolving science (best practice changes over a relatively short period of a few years) and understanding historical ecosystems could be very useful in informing best management practices today	5	6	4	3	8	2	1	7
2023-03-28 19:29:53	2023-03-28 19:34:47	IP Address	96	293	False	2023-04-04 19:34:47	R_3rXVVUpmTh2DfA5	anonymous	EN	Yes	Assistant Ecologist	Private (e.g. consultancy)		10-15 years	Surveying species and habitats		Neutral and calcareous grasslands,Standing open waters and rivers		Yes	Maybe	The ecology of prehistoric life	No										Very helpful	Very helpful	Very helpful	Could be helpful	Very helpful	Very helpful	Very helpful	May or may not	Working out what worked before and applying it to a modern site	5	6	3	4	2	7	1	8
2023-04-06 10:02:28	2023-04-06 10:17:48	IP Address	100	919	True	2023-04-06 10:17:48	R_1ON7dwiI2zmOjuP	anonymous	EN	Yes	Nature Based Solutions Manager	Environmental NGO (e.g. Wildlife Trust, RSPB)		10-15 years	Advisory role inc. planning, land management, etc.		Woodlands, ancient and semi-natural,Neutral and calcareous grasslands,Standing open waters and rivers,Peri-urban and urban greenspaces		Yes	Maybe	Looking at natural elements of the past (plant/ rock etc) to allow us to see how things have evolved	No										Could be helpful	Very helpful	Could be helpful	Could be helpful	Could be helpful	Could be helpful	Could be helpful	Definitely yes	Information relating to the past ecology of a site can be very helpful in establishing what was there. However, with climatic changes it may not be possible or appropriate to replicate those habitats in the present day. However, it can inform what changes have taken place and what might occur moving forward. This could allow for both protection and adaptation of the habitats and the species withi…	1	3	6	2	8	5	4	7
2023-04-06 10:36:58	2023-04-06 10:39:52	IP Address	100	174	True	2023-04-06 10:39:53	R_xf3jelbZYCMUYiR	anonymous	EN	Yes	manager	Private (e.g. consultancy)		5-10 years	Strategy and policy		Peri-urban and urban greenspaces		Yes	Maybe	Paleoecology is a science that studies the relationship between ancient organisms and ancient environment, a marginal science of geology and ecology, and an advanced theoretical form of paleontology	Yes	Could be helpful	Very helpful	Very helpful	Very helpful	Could be helpful	Very helpful	Very helpful												8	4	6	5	7	2	3	1
2023-04-06 11:06:43	2023-04-06 11:13:15	IP Address	100	391	True	2023-04-06 11:13:16	R_25tPs9A9VJtwVYd	anonymous	EN	Yes	GIS, Research, and Monitoring Officer	Environmental NGO (e.g. Wildlife Trust, RSPB)		0-5 years	GIS and site mapping		Woodlands, ancient and semi-natural,Heathlands and acid grasslands,Neutral and calcareous grasslands,Standing open waters and rivers		Yes	Maybe	Reconstructing the ecology of past ecosystems, for which we don't have direct primary data available, and have to infer species occurrence / ecological processes from alternative sources e.g., sediment cores, isotope ratios	No										Very helpful	Very helpful	Very helpful	Could be helpful	Very helpful	Could be helpful	Could be helpful	Probably yes		2	3	4	5	7	6	1	8
2023-04-06 11:28:58	2023-04-06 11:51:51	IP Address	100	1372	True	2023-04-06 11:51:52	R_PCBckM1iJYcjZYt	anonymous	EN	Yes	Head of Nature Reserves	Environmental NGO (e.g. Wildlife Trust, RSPB)		15+ years	Writing site management plans,Delivering practical conservation and land management,Surveying species and habitats,Strategy and policy,Senior leadership,Public engagement inc. education, citizen science, etc.,Advisory role inc. planning, land management, etc.		Woodlands, ancient and semi-natural,Heathlands and acid grasslands,Neutral and calcareous grasslands,Standing open waters and rivers,Wetlands including fens, bogs, grazing marsh etc.,Coastal, saltmarsh and marine,Peri-urban and urban greenspaces		Yes	Yes	I have been involved directly in supporting MSc and PhD projects in paleoecology to look at the previous habitats that have existed under our nature reserves. This has mainly been through the pollen record, diatoms and carbon dating.	Yes	Very helpful	Very helpful	Very helpful	Very helpful	Very helpful	Very helpful	Very helpful	The 'submerged forest' off the Lincolnshire coast to look at the tree composition of a post glacial forest and to note that climate change and sea level rise is not a new phenomenon! Post-glacial history of fenland nature reserves to look for stratigraphic markers to indicate changing habitats over time. Pollen record of a small wet meadow that evolved in a post-glacial outwash basin and has appe…	We use universities or professional people and they interpret the findings for us.										1	3	7	2	8	4	6	5	That's proved quite a difficult question to answer and I don't think it is particularly well written? Sorry!
2023-04-06 12:14:01	2023-04-06 12:34:49	IP Address	100	1247	True	2023-04-06 12:34:50	R_1N9XamWU8u98mEI	anonymous	EN	Yes	Catchment partnership agricultural advisor	Environmental NGO (e.g. Wildlife Trust, RSPB)		0-5 years	Advisory role inc. planning, land management, etc.		Heathlands and acid grasslands,Neutral and calcareous grasslands,Standing open waters and rivers,Wetlands including fens, bogs, grazing marsh etc.		Yes	Yes	extinct habitat and species interactions, relationships and ecosystems	No										Very helpful	Very helpful	Very helpful	Could be helpful	Very helpful	Could be helpful	Could be helpful	Definitely yes	Past faming practices, past species traits and activities that affect soil health and increase biodiversity	1	2	7	6	8	4	5	3	I sometimes worry about relevance, specifically allocating resources to recreating the past for it's own sake, in a way that does not adapt to the changing world and future. We should not show bias towards past ecosystems.
2023-04-06 12:04:25	2023-04-06 12:41:27	IP Address	100	2222	True	2023-04-06 12:41:27	R_x96BcgV3NFDyolb	anonymous	EN	Yes	Conservation and volunteering officer	Environmental NGO (e.g. Wildlife Trust, RSPB)		0-5 years	Delivering practical conservation and land management,Surveying species and habitats,Public engagement inc. education, citizen science, etc.		Heathlands and acid grasslands,Neutral and calcareous grasslands,Standing open waters and rivers,Wetlands including fens, bogs, grazing marsh etc.,Coastal, saltmarsh and marine		Yes	Maybe	using fossil (pollen, seed, vegetation) record to understand historic ecology and land use	No										Very helpful	Very helpful	Very helpful	Could be helpful	Could be helpful	Very helpful	Not helpful	May or may not	in current role don't have funding for this or the opportunity to change land use in response to findings	1	3	5	4	7	2	6	8
2023-04-06 17:29:48	2023-04-06 17:55:26	IP Address	100	1537	True	2023-04-06 17:55:26	R_2rHZGpP9iLFE6ME	anonymous	EN	Yes	Wetland Projects Manager	Environmental NGO (e.g. Wildlife Trust, RSPB)		10-15 years	Delivering practical conservation and land management,Surveying species and habitats,GIS and site mapping,Strategy and policy,Public engagement inc. education, citizen science, etc.,Advisory role inc. planning, land management, etc.		Standing open waters and rivers,Wetlands including fens, bogs, grazing marsh etc.		Yes	Maybe	The study of how ecosystems functioned in the past	No										Could be helpful	Very helpful	Could be helpful	Could be helpful	Could be helpful	Very helpful	Could be helpful	Definitely yes	Surrey's rivers have been artificially modified to varying degrees for the past 2000 years. Natural watercourses are now rarer than modified watercourses, making it difficult to understand how the river would naturally have functioned in the landscape. The majority of rivers are now confined to their channels and disconnected from their flood plains. These flood plains in their natural state woul…	3	1	7	2	8	4	5	6
2023-03-30 18:14:29	2023-03-30 18:18:07	IP Address	72	217	False	2023-04-06 18:18:07	R_3M6dVe78Kzt9T8u	anonymous	EN	Yes	Policy official	Statutory body (e.g. DEFRA, Natural England)		15+ years	Strategy and policy		Standing open waters and rivers,Wetlands including fens, bogs, grazing marsh etc.,Coastal, saltmarsh and marine		No	No		No										Could be helpful	Very helpful	Very helpful	Could be helpful	Could be helpful	Very helpful	Could be helpful	Probably not
2023-04-06 21:57:10	2023-04-06 22:03:23	IP Address	100	372	True	2023-04-06 22:03:23	R_11Yn0cjtxRB5LRj	anonymous	EN	Yes	Assistant Ecologist	Private (e.g. consultancy)		0-5 years	Writing site management plans,Surveying species and habitats		Neutral and calcareous grasslands,Peri-urban and urban greenspaces		Yes	Yes	Studying the location and makeup of historic ecosystems	No										Could be helpful	Very helpful	Very helpful	Very helpful	Could be helpful	Very helpful	Not helpful	Probably not		8	3	4	5	6	1	2	7
2023-04-07 13:33:14	2023-04-07 13:43:19	IP Address	100	605	True	2023-04-07 13:43:20	R_2YKiabNKG6UyYVV	anonymous	EN	Yes	Countryside Ranger	Local government (e.g. borough or county council)		5-10 years	Delivering practical conservation and land management,Surveying species and habitats,Public engagement inc. education, citizen science, etc.		Neutral and calcareous grasslands,Wetlands including fens, bogs, grazing marsh etc.,Peri-urban and urban greenspaces		No	Maybe	The past ecology of an area.	No										Could be helpful	Very helpful	Could be helpful	Could be helpful	Very helpful	Very helpful	Could be helpful	Definitely yes	It would be great to know about the presence of species which may no longer exist in the area or use it to determine past populations. Being able to compare both of these to the present would be helpful to guide us in our habitat management.	2	1	6	3	7	5	4	8
2023-04-11 09:28:41	2023-04-11 12:48:33	IP Address	100	11992	True	2023-04-11 12:48:33	R_O3Bp9hpSmgoEPoB	anonymous	EN	Yes	Reserves Officer	Environmental NGO (e.g. Wildlife Trust, RSPB)		0-5 years	Delivering practical conservation and land management		Woodlands, ancient and semi-natural,Heathlands and acid grasslands,Neutral and calcareous grasslands,Standing open waters and rivers		No	No		No										Could be helpful	Very helpful	Very helpful	Very helpful	Could be helpful	Could be helpful	Could be helpful	Definitely yes	i would say it would be beneficial and of great interest to understand the environmental history of a site and perhaps identify reasons why certain species are no longer there.	7	2	6	3	8	4	5	1
2023-04-11 12:43:28	2023-04-11 12:52:38	IP Address	100	549	True	2023-04-11 12:52:39	R_3vYAU7VNGA8npbH	anonymous	EN	Yes	Conservation Manager-Surrey Wildlife Trust	Environmental NGO (e.g. Wildlife Trust, RSPB)		5-10 years	Writing site management plans,Delivering practical conservation and land management,Surveying species and habitats		Heathlands and acid grasslands		Yes	Maybe	The study into what ecosystems would have been like in the past.	No										Very helpful	Very helpful	Could be helpful	Very helpful	Very helpful	Could be helpful	Could be helpful	Definitely yes	How it can help inform future management on lowland heathland based on what management was done in the past and how that affected site condition.	2	1	5	6	8	4	3	7
2023-04-06 11:17:07	2023-04-06 13:12:28	IP Address	48	6920	False	2023-04-13 13:12:30	R_3EFuA1Ypqvqw2cs	anonymous	EN	Yes	Conservation Director	Environmental NGO (e.g. Wildlife Trust, RSPB)		15+ years	Delivering practical conservation and land management,Strategy and policy,Senior leadership,Advisory role inc. planning, land management, etc.		Woodlands, ancient and semi-natural,Heathlands and acid grasslands,Neutral and calcareous grasslands,Standing open waters and rivers,Wetlands including fens, bogs, grazing marsh etc.,Peri-urban and urban greenspaces		Yes	Maybe	Studying the compositin and functioning of historic ecosystems, to nform unsdertanding of extant ones.	Yes
2023-04-06 14:58:44	2023-04-06 15:01:00	IP Address	48	136	False	2023-04-13 15:01:05	R_2veku76qCrvZxe6	anonymous	EN	Yes	Ranger	Local government (e.g. borough or county council)		0-5 years	Delivering practical conservation and land management,Surveying species and habitats,Public engagement inc. education, citizen science, etc.		Coastal, saltmarsh and marine		Yes	No		No
2023-04-14 14:47:57	2023-04-14 14:53:20	IP Address	100	323	True	2023-04-14 14:53:20	R_3R4SHGsp7TLtJPA	anonymous	EN	Yes	Director	Private (e.g. consultancy)		10-15 years	GIS and site mapping,Strategy and policy,Senior leadership,Advisory role inc. planning, land management, etc.		Woodlands, ancient and semi-natural,Heathlands and acid grasslands,Neutral and calcareous grasslands,Wetlands including fens, bogs, grazing marsh etc.		Yes	Maybe	ecology from pre-history, i.e. prior to large human settlement	No										Could be helpful	Could be helpful	Very helpful	Could be helpful	Could be helpful	Could be helpful	Not helpful	Probably yes	understanding natural distribution of semi-natural habitats; understanding past assemblage composition; understanding past management practices	5	2	7	6	8	3	1	4
2023-04-19 11:49:29	2023-04-19 12:04:49	IP Address	100	920	True	2023-04-19 12:04:50	R_2SBUDO06An0oLQg	anonymous	EN	Yes	Senior Adviser	Statutory body (e.g. DEFRA, Natural England)		15+ years	Strategy and policy		Woodlands, ancient and semi-natural,Heathlands and acid grasslands,Neutral and calcareous grasslands,Standing open waters and rivers,Wetlands including fens, bogs, grazing marsh etc.,Coastal, saltmarsh and marine,Upland and montane		Yes	Maybe	An understanding of ecology prior to the Neolithic.	No										Could be helpful	Very helpful	Could be helpful	Very helpful	Not helpful	Very helpful	Not helpful	Definitely yes	Used to understand natural ecosystem function and what we could aspire to in the future in terms of thriving wildlife.	1	3	7	6	8	2	4	5
2023-04-21 12:49:02	2023-04-21 13:11:25	IP Address	100	1343	True	2023-04-21 13:11:26	R_UEiVuxJ4rKjHiXn	anonymous	EN	Yes	Programme Officer - IUCN UK PP	Environmental NGO (e.g. Wildlife Trust, RSPB)		0-5 years	Strategy and policy		Wetlands including fens, bogs, grazing marsh etc.		Yes	Yes	The study of prehistoric ecology across borad time scales	No										Very helpful	Very helpful	Very helpful	Could be helpful	Very helpful	Very helpful	Could be helpful	Definitely yes	In the conservation of Peatlands there are two areas of discussion that imdeiately spring to mind where palaecological reseach could have valuble input. The first is around whether we are restoring our bogs to a state that is going to be sustainable in the face of predicted climate change, why rewet when the climate in 50-100 years will be too dry? Palecological reseach has so far shown that in a…	1	6	5	3	7	4	2	8	So this isn't so relevant to our work as we do not engage directly in conservation but i would say if the funders of conservation could be made aware of the importance of this data they would be more likely to give conservation groups the money needed to comision this research.
2023-04-27 09:49:01	2023-04-27 10:34:13	IP Address	100	2712	True	2023-04-27 10:34:13	R_1dp04YCxybs7bLC	anonymous	EN	Yes	Conservation Manager	Environmental NGO (e.g. Wildlife Trust, RSPB)		10-15 years	Writing site management plans,Delivering practical conservation and land management,Surveying species and habitats		Woodlands, ancient and semi-natural,Heathlands and acid grasslands,Wetlands including fens, bogs, grazing marsh etc.		Yes	Yes	The Ecology of geological and environmental matter in sequences over time through fossils and plant material	Yes	Very helpful	Very helpful	Very helpful	Very helpful	Very helpful	Very helpful	Very helpful	Recent paleoarchological surveys on Wishmoor bottom Valley mire to initially establish peat depths, but also to investigate peat condition, the substance of the organic matter and to further investigate the sequences within the valley mire.	Academic journals and data from previous research on Chobham Common Langshot bog, moorland deep peat raised bog surveys and valley mire surveys and projects on Exmoor and Dartmoor.										6	5	3	2	8	4	1	7
2023-05-02 08:31:04	2023-05-02 08:39:01	IP Address	100	477	True	2023-05-02 08:39:02	R_1OBRjqZlJhm9ekJ	anonymous	EN	Yes	Ecology & Arb Officer (Previous parks & Countryside Service Manager)	Local government (e.g. borough or county council)		15+ years	Writing site management plans,Delivering practical conservation and land management,Surveying species and habitats,GIS and site mapping,Strategy and policy,Senior leadership,Public engagement inc. education, citizen science, etc.,Advisory role inc. planning, land management, etc.		Woodlands, ancient and semi-natural,Neutral and calcareous grasslands		Yes	Maybe	Have heard of it, mainly via Time Team and other media based Archaeology	No										Not helpful	Could be helpful	Not helpful	Not helpful	Could be helpful	Not helpful	Not helpful	May or may not	If PE can help with understanding what we had in similar climate change conditions (eg more Ginkgos etc) then should help plan for the future. Otherwise why look back when so much is different?	2	5	3	4	6	1	7	8
2023-05-02 11:52:16	2023-05-02 12:06:34	IP Address	100	857	True	2023-05-02 12:06:35	R_3jVUbxrm1zgai24	anonymous	EN	Yes	Ecologist	Local government (e.g. borough or county council)		15+ years	Strategy and policy,Public engagement inc. education, citizen science, etc.,Advisory role inc. planning, land management, etc.		Wetlands including fens, bogs, grazing marsh etc.,Coastal, saltmarsh and marine,Peri-urban and urban greenspaces		Yes	Yes	Study of and reconstruction/ inference of ecological relationships and ecosystems in the ancient past by analysis of geological / archaeological information	Yes	Very helpful	Very helpful	Very helpful	Could be helpful	Very helpful	Could be helpful	Could be helpful	Used to run a wetland restoration project on a drained fen peat farmland site. My work mainly with the farmers and conservation agencies bringing about practical restoration action, but had some minor intersection with Star Carr project archaeologists studying the landscape setting and past environments - which were useful in giving a narrative to the restoration work, aiming for a modern day wet…	none - but read some of the archaeological reports or summaries on Mesolithic research.										2	3	4	1	7	6	5	8
2023-05-04 09:22:45	2023-05-04 09:31:21	IP Address	100	516	True	2023-05-04 09:31:21	R_2e3F1YaEpx5ScJ6	anonymous	EN	Yes	Specialist Environmental Services Manager	Local government (e.g. borough or county council)		15+ years	Surveying species and habitats,Senior leadership,Advisory role inc. planning, land management, etc.		Woodlands, ancient and semi-natural,Heathlands and acid grasslands,Neutral and calcareous grasslands,Standing open waters and rivers,Wetlands including fens, bogs, grazing marsh etc.,Coastal, saltmarsh and marine,Peri-urban and urban greenspaces		Yes	Maybe	looking at fossil records to determine past habitats and environmental conditions	No										Could be helpful	Could be helpful	Could be helpful	Could be helpful	Could be helpful	Could be helpful	Could be helpful	Probably yes	understanding past ecosystems doesn't necessarily mean they can be restored to that state given current environmental conditions and climate change but can provide context	1	3	6	2	7	4	5	8
2023-05-04 09:18:56	2023-05-04 09:44:47	IP Address	100	1550	True	2023-05-04 09:44:48	R_2ypv39hAxM4phPj	anonymous	EN	Yes	Natural Environment Officer (LNRS co-ordinator)	Local government (e.g. borough or county council)		0-5 years	Strategy and policy		Woodlands, ancient and semi-natural,Heathlands and acid grasslands,Neutral and calcareous grasslands,Standing open waters and rivers,Wetlands including fens, bogs, grazing marsh etc.,Peri-urban and urban greenspaces		Yes	Yes	Analysing soil and bedrock strata to inform understanding of past assemblages of plants and animals in a given location. However I am not sure how (with exception of pollen) this is done e.g. what actually remains that has a signature specific enough to inform understanding of specific species...don't animals and plants just basically rot down? Sounds interesting though! ....OK now I just read th…	No										Could be helpful	Very helpful	Could be helpful	Could be helpful	Very helpful	Very helpful	Very helpful	Probably yes	It could be interesting e.g. for Local Nature Recovery Strategy, but could be challenging to communicate in a simple way and make it relevant to today's challenges. Perhaps there are parallels with showing historic maps which show to land owners in order to encourage hedgerow restoration/ woodland re-creation. Potential down side would be over complicating the situation...if used it should defini…	7	1	3	2	6	5	4	8
2023-05-04 10:04:47	2023-05-04 10:25:58	IP Address	100	1271	True	2023-05-04 10:25:59	R_1GH5vmLxqJFwSZ4	anonymous	EN	Yes	Project and Volunteer Coordinator, Surrey Hills Society	Environmental NGO (e.g. Wildlife Trust, RSPB)		0-5 years	Delivering practical conservation and land management,Surveying species and habitats,Public engagement inc. education, citizen science, etc.		Heathlands and acid grasslands,Neutral and calcareous grasslands,Other	Arable fields	Yes	Maybe	Using fossil history to give context to the state of nature millions of years ago.	No										Very helpful	Very helpful	Very helpful	Very helpful	Very helpful	Very helpful	Could be helpful	Probably yes	Learn about past state of natural ecosystems can help us educate public about what we should be aiming for and what a 'good' natural ecosystem might look like. Knowing what species used to live on a site can be used as a target to get habitat back into condition that is able to support these species (if not extinct).	2	1	6	3	7	4	5	8	Resource/equipment - do you need special facilities or equipment to look at say fossil records and interpret them in a particular way?
2023-05-04 10:43:25	2023-05-04 10:54:54	IP Address	100	689	True	2023-05-04 10:54:55	R_2VeYt8cLXS6QzZ8	anonymous	EN	Yes	Senior Conservation Officer	Environmental NGO (e.g. Wildlife Trust, RSPB)		5-10 years	Strategy and policy,Senior leadership		Heathlands and acid grasslands,Wetlands including fens, bogs, grazing marsh etc.,Coastal, saltmarsh and marine		Yes	Yes	Historic ecology, where did species and habitats previously occur and their abundance using fossil records etc.	No										Very helpful	Very helpful	Could be helpful	Could be helpful	Could be helpful	Very helpful	Could be helpful	Probably yes	This could be useful particularly in understanding how changes particularly in climate could impact species and habitats and to inform ambition re restoration.	2	1	6	3	7	4	5	8
2023-05-04 11:26:11	2023-05-04 11:48:48	IP Address	100	1356	True	2023-05-04 11:48:48	R_3fqjIz1UZdZHU6C	anonymous	EN	Yes	Grazing officer	Local government (e.g. borough or county council)		10-15 years	Delivering practical conservation and land management,Surveying species and habitats		Neutral and calcareous grasslands		Yes	Maybe	The study of the ecology of past ecosystems and attempt to understand the interactions of those habitats and species.	No										Very helpful	Very helpful	Very helpful	Very helpful	Could be helpful	Could be helpful	Could be helpful	Definitely yes	I will try to keep brief and use one example - I think with delivery of conservation on the ground, there can be a very narrow idea of what management should be and a short term view of what success looks like. Grazing management on chalk grassland in particular is widely misunderstood in terms of why it exists and what maintained it. This often results in success being measured by the population…	5	1	6	4	8	2	3	7
2023-05-04 13:33:41	2023-05-04 13:47:36	IP Address	100	834	True	2023-05-04 13:47:37	R_3il5hoy2gQFebiV	social	EN	Yes	Associate Director (Ecology)	Private (e.g. consultancy)		15+ years	Surveying species and habitats,Senior leadership,Advisory role inc. planning, land management, etc.		Woodlands, ancient and semi-natural,Neutral and calcareous grasslands,Peri-urban and urban greenspaces		Yes	Maybe	Understanding pre-historic ecological functions, primarily through fossil evidence.	No										Could be helpful	Very helpful	Could be helpful	Very helpful	Could be helpful	Very helpful	Could be helpful	Probably yes	It could be helpful for understanding 'natural' ecosystem states to inform targets for restoration management. In addition, I think it could be really helpful in understanding ecosystem response to climate change, which could help us plan better to allow for adaptation.	5	6	2	3	8	4	1	7	No general awareness of its relevance or applicability. Unclear where economic drivers would come from to generate commercial interest.
2023-05-04 14:16:11	2023-05-04 14:26:46	IP Address	100	634	True	2023-05-04 14:26:47	R_qDxgLoEZIJVDZm1	anonymous	EN	Yes	Green Infrastructure Manager	Local government (e.g. borough or county council)		5-10 years	Delivering practical conservation and land management,Surveying species and habitats,GIS and site mapping,Strategy and policy,Public engagement inc. education, citizen science, etc.,Advisory role inc. planning, land management, etc.		Woodlands, ancient and semi-natural,Heathlands and acid grasslands,Peri-urban and urban greenspaces		No	Maybe	Understanding of earlier ecosystems to inform today's practical conservation.	No										Could be helpful	Could be helpful	Could be helpful	Could be helpful	Not helpful	Could be helpful	Not helpful	May or may not		4	2	6	3	5	1	8	7
2023-05-05 08:28:17	2023-05-05 08:38:09	IP Address	100	592	True	2023-05-05 08:38:10	R_x9IdT0x6VdeXUNr	anonymous	EN	Yes	Senior Planning Policy Officer	Local government (e.g. borough or county council)		10-15 years	Strategy and policy		Heathlands and acid grasslands		Yes	Maybe	The study of prehistoric ecology	No										Could be helpful	Not helpful	Could be helpful	Could be helpful	Not helpful	Could be helpful	Could be helpful	Probably not	It's not clear, but potentially it could be used to set targets for habitats and species restoration through BNG. However, I suspect that paleoecology would probably provide targets that are too far removed. Generally, we are trying to restore ecology from a much nearer timeframe.	6	5	3	1	4	2	7	8	In my role, planning, we are really only interested in outputs e.g. what needs to be conserved and what needs to be restored and where. This would filter to us through higher level ecology information (i.e. in the LNRS or another strategy) so we do not really need to engage directly with those doing research.
2023-05-05 13:51:28	2023-05-05 14:17:26	IP Address	100	1558	True	2023-05-05 14:17:27	R_3JxFMLdB2eUk5Pt	anonymous	EN	Yes	Natural Environment Team Manager (retired 2022)	Local government (e.g. borough or county council)		15+ years	Surveying species and habitats,Strategy and policy,Senior leadership,Advisory role inc. planning, land management, etc.		Woodlands, ancient and semi-natural,Heathlands and acid grasslands,Neutral and calcareous grasslands,Standing open waters and rivers,Wetlands including fens, bogs, grazing marsh etc.,Peri-urban and urban greenspaces		Yes	Yes	The study of past ecosystems and environments	Yes	Could be helpful	Very helpful	Very helpful	Very helpful	Could be helpful	Very helpful	Could be helpful	Research has been carried on countryside sites owned by Surrey County Council from different research organisations and educational establishments. I would request that all research was made available to the landowner to act on where appropriate. Research was often based on heathland sites with bogs or mires for pollen sampling.	This was normally direct with the research body or student.										6	7	3	2	5	1	4	8
2023-05-09 16:48:49	2023-05-09 16:53:11	IP Address	100	261	True	2023-05-09 16:53:11	R_2uvONwYHH0pg2jV	anonymous	EN	Yes	Senior Natural Environment Officer	Local government (e.g. borough or county council)		10-15 years	Advisory role inc. planning, land management, etc.		Woodlands, ancient and semi-natural,Neutral and calcareous grasslands,Standing open waters and rivers,Wetlands including fens, bogs, grazing marsh etc.,Peri-urban and urban greenspaces		Yes	No		No										Could be helpful	Could be helpful	Could be helpful	Could be helpful	Could be helpful	Could be helpful	Could be helpful	Probably not		6	3	2	1	8	4	5	7
2023-05-10 16:19:29	2023-05-10 18:23:00	IP Address	100	7410	True	2023-05-10 18:23:01	R_yBAxwCfhkIO5FRf	anonymous	EN	Yes	Director of Policy & Research	Environmental NGO (e.g. Wildlife Trust, RSPB)		15+ years	Strategy and policy,Senior leadership,Public engagement inc. education, citizen science, etc.,Advisory role inc. planning, land management, etc.		Woodlands, ancient and semi-natural,Neutral and calcareous grasslands,Wetlands including fens, bogs, grazing marsh etc.,Peri-urban and urban greenspaces		Yes	Yes	the ecological relationships of ancient organisms long since extinct, most of which we know through their fossilised remains and their place in the geological record	No										Could be helpful	Could be helpful	Could be helpful	Not helpful	Not helpful	Could be helpful	Could be helpful	Probably yes	by placing it in a temporal context. for example the narratives around chalk grasslands etc, start with the warm shallow seas of the Cretaceous, and the remains of small organisms forming the substrates that influence the floral, faunal and fungal communities that survive today. early British peoples' management of vegetation on chalk has influenced how we perceive those landscapes today - but ar…	2	6	7	5	8	1	3	4
2023-05-30 15:13:03	2023-05-30 15:22:35	IP Address	100	572	True	2023-05-30 15:22:36	R_3OrA4qDkS7VNf9x	anonymous	EN	Yes	Senior adviser, sustainable development	Statutory body (e.g. DEFRA, Natural England)		5-10 years	Advisory role inc. planning, land management, etc.		Woodlands, ancient and semi-natural,Heathlands and acid grasslands,Standing open waters and rivers,Wetlands including fens, bogs, grazing marsh etc.,Peri-urban and urban greenspaces		Yes	Yes	How ancient ecosystems functioned and changed over time. As studied through fossil records, palynological records, the rock record etc.	Yes	Very helpful	Very helpful	Very helpful	Very helpful	Very helpful	Could be helpful	Could be helpful	Geosciences degree course (finished in 2014) which included a masters project on a Jurassic palaeoenvironmental reconstruction from a local quarry site.	Journals, data, university resources. I got to visit the NHM to use their equipment.										3	1	5	2	7	6	4	8
[truncated: 9 more columns]
