# Supplementary material for: Practitioner perspectives on the application of palaeoecology in nature conservation
Source: Frontiers journal article supplement (doi:10.3389/fevo.2023.1304510), 2023-11-10
Supplement: Data_Sheet_3.xlsx [file Data_Sheet_3.xlsx]

## Sheet: 3.1 chi square
Table: Summary
	Cases
	Valid		Missing		Total
	N	Percent	N	Percent	N	Percent
Experienced Ã— How long have you worked in the conservation sector?	153	1	0	0	153	1
Experienced Ã— Sector	153	1	0	0	153	1
Experienced Ã— Career level	153	1	0	0	153	1
Table: Experienced Ã— How long have you worked in the conservation sector?
			How long have you worked in the conservation sector?				Total
			0-5 years	10-15 yea	15+ years	5-10 year
Experienced	No	Count	47	13	36	17	113
		Row %	0.416	0.115	0.319	0.15	1
		Column %	0.904	0.722	0.61	0.708	0.739
		Total %	0.307	0.085	0.235	0.111	0.739
	Ye	Count	5	5	23	7	40
		Row %	0.125	0.125	0.575	0.175	1
		Column %	0.096	0.278	0.39	0.292	0.261
		Total %	0.033	0.033	0.15	0.046	0.261
Total		Count	52	18	59	24	153
		Row %	0.34	0.118	0.386	0.157	1
		Column %	1	1	1	1	1
		Total %	0.34	0.118	0.386	0.157	1
Table: Chi-Square Tests
	Value	df	Asymptotic Sig. (2-tailed)
Pearson Chi-Square	12.53	3	0.006
Likelihood Ratio	13.74	3	0.003
N of Valid Cases	153
Table: Experienced Ã— Sector
			Sector					Total
			Environmental NGO (e.g. Wildlife Trust, RSPB)	Local government (e.g. borough or county coun	Other	Private (e.g. consultancy)	Statutory body (e.g. DEFRA, Natural England)
Experienced	No	Count	70	15	4	21	3	113
		Row %	0.619	0.133	0.035	0.186	0.027	1
		Column %	0.787	0.75	0.667	0.724	0.333	0.739
		Total %	0.458	0.098	0.026	0.137	0.02	0.739
	Ye	Count	19	5	2	8	6	40
		Row %	0.475	0.125	0.05	0.2	0.15	1
		Column %	0.213	0.25	0.333	0.276	0.667	0.261
		Total %	0.124	0.033	0.013	0.052	0.039	0.261
Total		Count	89	20	6	29	9	153
		Row %	0.582	0.131	0.039	0.19	0.059	1
		Column %	1	1	1	1	1	1
		Total %	0.582	0.131	0.039	0.19	0.059	1
Table: Chi-Square Tests
	Value	df	Asymptotic Sig. (2-tailed)
Pearson Chi-Square	8.92	4	0.063
Likelihood Ratio	7.76	4	0.101
N of Valid Cases	153
Table: Experienced Ã— Career level
			Career level				Total
			Junior	Manager	Operative	Senior
Experienced	No	Count	19	30	48	16	113
		Row %	0.168	0.265	0.425	0.142	1
		Column %	0.905	0.698	0.814	0.533	0.739
		Total %	0.124	0.196	0.314	0.105	0.739
	Ye	Count	2	13	11	14	40
		Row %	0.05	0.325	0.275	0.35	1
		Column %	0.095	0.302	0.186	0.467	0.261
		Total %	0.013	0.085	0.072	0.092	0.261
Total		Count	21	43	59	30	153
		Row %	0.137	0.281	0.386	0.196	1
		Column %	1	1	1	1	1
		Total %	0.137	0.281	0.386	0.196	1
Table: Chi-Square Tests
	Value	df	Asymptotic Sig. (2-tailed)
Pearson Chi-Square	11.64	3	0.009
Likelihood Ratio	11.69	3	0.009
N of Valid Cases	153
Table: Summary
	Cases
	Valid		Missing		Total
	N	Percent	N	Percent	N	Percent
Experienced Ã— How long have you worked in the conservation sector?	153	1	0	0	153	1
Experienced Ã— Sector	153	1	0	0	153	1
Experienced Ã— Career level	153	1	0	0	153	1
Table: Experienced Ã— How long have you worked in the conservation sector?
			How long have you worked in the conservation sector?				Total
			0-5 years	10-15 yea	15+ years	5-10 year
Experienced	No	Count	47	13	36	17	113
		Row %	0.416	0.115	0.319	0.15	1
		Column %	0.904	0.722	0.61	0.708	0.739
		Total %	0.307	0.085	0.235	0.111	0.739
	Ye	Count	5	5	23	7	40
		Row %	0.125	0.125	0.575	0.175	1
		Column %	0.096	0.278	0.39	0.292	0.261
		Total %	0.033	0.033	0.15	0.046	0.261
Total		Count	52	18	59	24	153
		Row %	0.34	0.118	0.386	0.157	1
		Column %	1	1	1	1	1
		Total %	0.34	0.118	0.386	0.157	1
Table: Chi-Square Tests
	Value	df	Asymptotic Sig. (2-tailed)
Pearson Chi-Square	12.53	3	0.006
Likelihood Ratio	13.74	3	0.003
N of Valid Cases	153
Table: Experienced Ã— Sector
			Sector					Total
			Environmental NGO (e.g. Wildlife Trust, RSPB)	Local government (e.g. borough or county coun	Other	Private (e.g. consultancy)	Statutory body (e.g. DEFRA, Natural England)
Experienced	No	Count	70	15	4	21	3	113
		Row %	0.619	0.133	0.035	0.186	0.027	1
		Column %	0.787	0.75	0.667	0.724	0.333	0.739
		Total %	0.458	0.098	0.026	0.137	0.02	0.739
	Ye	Count	19	5	2	8	6	40
		Row %	0.475	0.125	0.05	0.2	0.15	1
		Column %	0.213	0.25	0.333	0.276	0.667	0.261
		Total %	0.124	0.033	0.013	0.052	0.039	0.261
Total		Count	89	20	6	29	9	153
		Row %	0.582	0.131	0.039	0.19	0.059	1
		Column %	1	1	1	1	1	1
		Total %	0.582	0.131	0.039	0.19	0.059	1
Table: Chi-Square Tests
	Value	df	Asymptotic Sig. (2-tailed)
Pearson Chi-Square	8.92	4	0.063
Likelihood Ratio	7.76	4	0.101
N of Valid Cases	153
Table: Experienced Ã— Career level
			Career level				Total
			Junior	Manager	Operative	Senior
Experienced	No	Count	19	30	48	16	113
		Row %	0.168	0.265	0.425	0.142	1
		Column %	0.905	0.698	0.814	0.533	0.739
		Total %	0.124	0.196	0.314	0.105	0.739
	Ye	Count	2	13	11	14	40
		Row %	0.05	0.325	0.275	0.35	1
		Column %	0.095	0.302	0.186	0.467	0.261
		Total %	0.013	0.085	0.072	0.092	0.261
Total		Count	21	43	59	30	153
		Row %	0.137	0.281	0.386	0.196	1
		Column %	1	1	1	1	1
		Total %	0.137	0.281	0.386	0.196	1
Table: Chi-Square Tests
	Value	df	Asymptotic Sig. (2-tailed)
Pearson Chi-Square	11.64	3	0.009
Likelihood Ratio	11.69	3	0.009
N of Valid Cases	153
Table: Summary
	Cases
	Valid		Missing		Total
	N	Percent	N	Percent	N	Percent
Experienced Ã— Woodlands, ancient and semi-natural	153	1	0	0	153	1
Experienced Ã— Heathlands and acid grasslands	153	1	0	0	153	1
Experienced Ã— Neutral and calcareous grasslands	153	1	0	0	153	1
Experienced Ã— Standing open waters and rivers	153	1	0	0	153	1
Experienced Ã— Wetlands including fens, bogs, grazing marsh etc.	153	1	0	0	153	1
Experienced Ã— Coastal, saltmarsh and marine	153	1	0	0	153	1
Experienced Ã— Peri-urban and urban greenspaces	153	1	0	0	153	1
Experienced Ã— Upland and montane	153	1	0	0	153	1
Table: Experienced Ã— Woodlands, ancient and semi-natural
			Woodlands, ancient and semi-natural		Total
			0	1
Experienced	No	Count	39	74	113
		Row %	0.345	0.655	1
		Column %	0.796	0.712	0.739
		Total %	0.255	0.484	0.739
	Ye	Count	10	30	40
		Row %	0.25	0.75	1
		Column %	0.204	0.288	0.261
		Total %	0.065	0.196	0.261
Total		Count	49	104	153
		Row %	0.32	0.68	1
		Column %	1	1	1
		Total %	0.32	0.68	1
Table: Chi-Square Tests
	Value	df	Asymptotic Sig. (2-tailed)	Exact Sig. (2-tailed)	Exact Sig. (1-tailed)
Pearson Chi-Square	1.23	1	0.268
Likelihood Ratio	1.27	1	0.261
Fisher's Exact Test				0.326	0.182
Continuity Correction	0.83	1	0.362
N of Valid Cases	153
Table: Experienced Ã— Heathlands and acid grasslands
			Heathlands and acid grasslands		Total
			0	1
Experienced	No	Count	59	54	113
		Row %	0.522	0.478	1
		Column %	0.756	0.72	0.739
		Total %	0.386	0.353	0.739
	Ye	Count	19	21	40
		Row %	0.475	0.525	1
		Column %	0.244	0.28	0.261
		Total %	0.124	0.137	0.261
Total		Count	78	75	153
		Row %	0.51	0.49	1
		Column %	1	1	1
		Total %	0.51	0.49	1
Table: Chi-Square Tests
	Value	df	Asymptotic Sig. (2-tailed)	Exact Sig. (2-tailed)	Exact Sig. (1-tailed)
Pearson Chi-Square	0.26	1	0.608
Likelihood Ratio	0.26	1	0.608
Fisher's Exact Test				0.713	0.371
Continuity Correction	0.11	1	0.743
N of Valid Cases	153
Table: Experienced Ã— Neutral and calcareous grasslands
			Neutral and calcareous grasslands		Total
			0	1
Experienced	No	Count	41	72	113
		Row %	0.363	0.637	1
		Column %	0.683	0.774	0.739
		Total %	0.268	0.471	0.739
	Ye	Count	19	21	40
		Row %	0.475	0.525	1
		Column %	0.317	0.226	0.261
		Total %	0.124	0.137	0.261
Total		Count	60	93	153
		Row %	0.392	0.608	1
		Column %	1	1	1
		Total %	0.392	0.608	1
Table: Chi-Square Tests
	Value	df	Asymptotic Sig. (2-tailed)	Exact Sig. (2-tailed)	Exact Sig. (1-tailed)
Pearson Chi-Square	1.56	1	0.212
Likelihood Ratio	1.54	1	0.215
Fisher's Exact Test				0.259	0.145
Continuity Correction	1.12	1	0.289
N of Valid Cases	153
Table: Experienced Ã— Standing open waters and rivers
			Standing open waters and rivers		Total
			0	1
Experienced	No	Count	56	57	113
		Row %	0.496	0.504	1
		Column %	0.757	0.722	0.739
		Total %	0.366	0.373	0.739
	Ye	Count	18	22	40
		Row %	0.45	0.55	1
		Column %	0.243	0.278	0.261
		Total %	0.118	0.144	0.261
Total		Count	74	79	153
		Row %	0.484	0.516	1
		Column %	1	1	1
		Total %	0.484	0.516	1
Table: Chi-Square Tests
	Value	df	Asymptotic Sig. (2-tailed)	Exact Sig. (2-tailed)	Exact Sig. (1-tailed)
Pearson Chi-Square	0.25	1	0.62
Likelihood Ratio	0.25	1	0.62
Fisher's Exact Test				0.714	0.378
Continuity Correction	0.1	1	0.755
N of Valid Cases	153
Table: Experienced Ã— Wetlands including fens, bogs, grazing marsh etc.
			Wetlands including fens, bogs, grazing marsh etc.		Total
			0	1
Experienced	No	Count	63	50	113
		Row %	0.558	0.442	1
		Column %	0.851	0.633	0.739
		Total %	0.412	0.327	0.739
	Ye	Count	11	29	40
		Row %	0.275	0.725	1
		Column %	0.149	0.367	0.261
		Total %	0.072	0.19	0.261
Total		Count	74	79	153
		Row %	0.484	0.516	1
		Column %	1	1	1
		Total %	0.484	0.516	1
Table: Chi-Square Tests
	Value	df	Asymptotic Sig. (2-tailed)	Exact Sig. (2-tailed)	Exact Sig. (1-tailed)
Pearson Chi-Square	9.44	1	0.002
Likelihood Ratio	9.73	1	0.002
Fisher's Exact Test				0.003	0.002
Continuity Correction	8.34	1	0.004
N of Valid Cases	153
Table: Experienced Ã— Coastal, saltmarsh and marine
			Coastal, saltmarsh and marine		Total
			0	1
Experienced	No	Count	101	12	113
		Row %	0.894	0.106	1
		Column %	0.765	0.571	0.739
		Total %	0.66	0.078	0.739
	Ye	Count	31	9	40
		Row %	0.775	0.225	1
		Column %	0.235	0.429	0.261
		Total %	0.203	0.059	0.261
Total		Count	132	21	153
		Row %	0.863	0.137	1
		Column %	1	1	1
		Total %	0.863	0.137	1
Table: Chi-Square Tests
	Value	df	Asymptotic Sig. (2-tailed)	Exact Sig. (2-tailed)	Exact Sig. (1-tailed)
Pearson Chi-Square	3.52	1	0.061
Likelihood Ratio	3.23	1	0.072
Fisher's Exact Test				0.105	0.058
Continuity Correction	2.59	1	0.108
N of Valid Cases	153
Table: Experienced Ã— Peri-urban and urban greenspaces
			Peri-urban and urban greenspaces		Total
			0	1
Experienced	No	Count	64	49	113
		Row %	0.566	0.434	1
		Column %	0.711	0.778	0.739
		Total %	0.418	0.32	0.739
	Ye	Count	26	14	40
		Row %	0.65	0.35	1
		Column %	0.289	0.222	0.261
		Total %	0.17	0.092	0.261
Total		Count	90	63	153
		Row %	0.588	0.412	1
		Column %	1	1	1
		Total %	0.588	0.412	1
Table: Chi-Square Tests
	Value	df	Asymptotic Sig. (2-tailed)	Exact Sig. (2-tailed)	Exact Sig. (1-tailed)
Pearson Chi-Square	0.85	1	0.356
Likelihood Ratio	0.86	1	0.353
Fisher's Exact Test				0.455	0.232
Continuity Correction	0.54	1	0.461
N of Valid Cases	153
Table: Experienced Ã— Upland and montane
			Upland and montane		Total
			0	1
Experienced	No	Count	107	6	113
		Row %	0.947	0.053	1
		Column %	0.754	0.545	0.739
		Total %	0.699	0.039	0.739
	Ye	Count	35	5	40
		Row %	0.875	0.125	1
		Column %	0.246	0.455	0.261
		Total %	0.229	0.033	0.261
Total		Count	142	11	153
		Row %	0.928	0.072	1
		Column %	1	1	1
		Total %	0.928	0.072	1
Table: Chi-Square Tests
	Value	df	Asymptotic Sig. (2-tailed)	Exact Sig. (2-tailed)	Exact Sig. (1-tailed)
Pearson Chi-Square	2.29	1	0.13
Likelihood Ratio	2.06	1	0.151
Fisher's Exact Test				0.165	0.126
Continuity Correction	1.34	1	0.247
N of Valid Cases	153

## Sheet: 3.2 K-W
Independent-Samples Kruskal-Wallis Test Summary
Total N	1001
Test Statistic	73.586a
Degree Of Freedom	6
Asymptotic Sig.(2-sided test)	7.49401e-14
a. The test statistic is adjusted for ties.
Homogeneous Subsets based on use
		Subset
		1	2	3
Samplea	7	397.094
	5	437.423
	4	452.895
	3		516.671
	6		522.773
	1		576.234	576.234
	2			603.909
Test Statistic		3.80848	4.91482	1.04741
Sig. (2-sided test)		0.148936	0.0856565	0.306103
Adjusted Sig. (2-sided test)		0.313598	0.188562	0.721688
Homogeneous subsets are based on asymptotic significances. The significance level is .050.
a. Each cell shows the sample average rank of use.

## Sheet: 3.3 K-W
Independent-Samples Kruskal-Wallis Test Summary
Total N	1112
Test Statistic	353.165a
Degree Of Freedom	7
Asymptotic Sig.(2-sided test)	0
a. The test statistic is adjusted for ties.
Homogeneous Subsets based on Barrier
		Subset
		1	2	3	4	5
Samplea	2.00	323
	4.00		417
	1.00		438
	7.00		444
	6.00			517
	3.00				686
	8.00					755
	5.00					872
Test Statistic		.b	0.695956	.b	.b	3.74174
Sig. (2-sided test)			0.706114			0.053069
Adjusted Sig. (2-sided test)			0.961822			0.195968
Homogeneous subsets are based on asymptotic significances. The significance level is .050.
a. Each cell shows the sample average rank of Barrier.
b. Unable to compute because the subset contains only one sample.

## Sheet: 3.4 K-W
Independent-Samples Kruskal-Wallis Test Summary
Total N	966
Test Statistic	195.580a
Degree Of Freedom	6
Asymptotic Sig.(2-sided test)	0
a. The test statistic is adjusted for ties.
Homogeneous Subsets based on solution
		Subset
		1	2	3
Samplea	1.00	290.5
	3.00	295.5
	5.00		526.5
	7.00		544.5
	2.00		546.5
	4.00		551.5
	6.00			629.5
Test Statistic		0.297901	1.08953	.b
Sig. (2-sided test)		0.585201	0.779603
Adjusted Sig. (2-sided test)		0.954035	0.929106
Homogeneous subsets are based on asymptotic significances. The significance level is .050.
a. Each cell shows the sample average rank of solution.
b. Unable to compute because the subset contains only one sample.
