# Supplementary material for: Practitioner perspectives on the application of palaeoecology in nature conservation
Source: Frontiers journal article supplement (doi:10.3389/fevo.2023.1304510), 2023-11-10
Supplement: Data_Sheet_4.zip [file Data_Sheet_4.zip]

## Sheet: Sheet1
Name		Files	References	Created on	Created by	Modified on	Modified by
In your own words, could you explain what you understand palaeoecology to be Please only write a sentence or two		1	212	2023-07-20 14:21:30	BS	2023-07-20 14:21:30	BS
Application		1	27	2023-07-21 09:51:25	BS	2023-07-21 16:22:17	BS
future prediction		1	3	2023-07-21 15:28:23	BS	2023-07-21 15:53:52	BS
Land management		1	7	2023-07-21 09:52:48	BS	2023-07-21 16:17:32	BS
Past site condition		1	7	2023-07-21 10:13:16	BS	2023-07-21 16:05:51	BS
Past species		1	9	2023-07-21 09:51:25	BS	2023-07-21 17:29:26	BS
Ecology		1	123	2023-07-21 09:52:22	BS	2023-07-21 16:56:27	BS
climate		1	2	2023-07-21 14:31:28	BS	2023-07-21 15:53:36	BS
Ecosystems		1	33	2023-07-21 10:05:51	BS	2023-07-21 16:55:36	BS
Environment		1	8	2023-07-21 10:15:27	BS	2023-07-21 16:57:09	BS
Organisms		1	8	2023-07-21 10:05:46	BS	2023-07-21 16:57:00	BS
Methods		1	76	2023-07-21 09:50:44	BS	2023-07-21 16:22:26	BS
dating		1	2	2023-07-21 10:17:32	BS	2023-07-21 16:02:36	BS
diatoms		1	1	2023-07-21 16:02:50	BS	2023-07-21 16:02:50	BS
fossils or remains		1	32	2023-07-21 10:14:05	BS	2023-07-21 16:18:51	BS
isotopes		1	1	2023-07-21 16:03:49	BS	2023-07-21 16:03:49	BS
Other indicators		1	6	2023-07-21 09:53:43	BS	2023-07-21 15:54:33	BS
pollen		1	17	2023-07-21 10:08:27	BS	2023-07-21 16:18:55	BS
Sediment		1	15	2023-07-21 09:50:44	BS	2023-07-21 16:13:46	BS
Time		1	121	2023-07-21 09:50:44	BS	2023-07-21 16:22:31	BS
Both recent and deep time		1	1	2023-07-21 10:55:03	BS	2023-07-21 10:55:12	BS
Deep time		1	20	2023-07-21 09:50:44	BS	2023-07-21 16:18:41	BS
Recent time		1	6	2023-07-21 09:50:44	BS	2023-07-21 15:58:41	BS
Unspecified time		1	94	2023-07-21 10:01:57	BS	2023-07-21 16:17:56	BS
